# Supplementary material
Source: PubMed Central journal article supplement (PMC2995308)
Supplement: NIHMS250221-supplement-1_si_001.pdf [file NIHMS250221-supplement-1_si_001.pdf]

## SUPPORTING INFORMATION

**Mechanism of the Swern Oxidation: Significant Deviations from  
Transition State Theory**

*Thomas Giagou and Matthew P. Meyer\**

*University of California, Merced, School of Natural Sciences P.O. Box 2039,  
Merced, California 95343*

mmeyer@ucmerced.edu

**Table of Contents**

|                                                                            |    |
|----------------------------------------------------------------------------|----|
| Synthesis and Characterization of <i>d</i> -Benzyl Alcohols.....           | 2  |
| Procedure for Measuring Intramolecular <sup>2</sup> H KIEs.....            | 4  |
| Raw Data from Intramolecular <sup>2</sup> H KIE Experiments.....           | 5  |
| Derivations of Kinetic Expressions for the KIE.....                        | 9  |
| Equations 1&2.....                                                         | 9  |
| Equation 4-6.....                                                          | 10 |
| Procedure for Computing KIEs.....                                          | 11 |
| Computing KIEs for Individual Transition Structures.....                   | 11 |
| Computing KIEs using Equations 5 and 6.....                                | 11 |
| Optimized Reactant and Transition Structures (B3LYP/6-31+G(d,p).....       | 11 |
| <b>Model Ylide (7; gas phase)</b> .....                                    | 12 |
| <b>Model Ylide Stereoinversion Transition Structure (gas phase)</b> ....   | 12 |
| <b>Endo-TS1 (gas phase)</b> .....                                          | 12 |
| <b>Endo-TS1 (PCM - CH<sub>2</sub>Cl<sub>2</sub>)</b> .....                 | 13 |
| <b>Endo-TS1 (PCM - CHCl<sub>3</sub>)</b> .....                             | 14 |
| <b>Endo-TS1 (PCM - CCl<sub>4</sub>)</b> .....                              | 15 |
| <b>Endo-TS1 (PCM - dichloroethane)</b> .....                               | 15 |
| <b>Endo-TS1 (PCM - chlorobenzene)</b> .....                                | 16 |
| <b>Exo-TS1 (gas phase)</b> .....                                           | 17 |
| <b>Exo-TS1 (PCM - CH<sub>2</sub>Cl<sub>2</sub>)</b> .....                  | 18 |
| <b>Exo-TS1 (PCM - CHCl<sub>3</sub>)</b> .....                              | 18 |
| <b>Exo-TS1 (PCM - CCl<sub>4</sub>)</b> .....                               | 19 |
| <b>Exo-TS1 (PCM - dichloroethane)</b> .....                                | 20 |
| <b>Exo-TS1 (PCM - chlorobenzene)</b> .....                                 | 20 |
| Ylide Preceding <b>Endo-TS1 (gas phase)</b> .....                          | 21 |
| Ylide Preceding <b>Endo-TS1 (PCM - CH<sub>2</sub>Cl<sub>2</sub>)</b> ..... | 22 |
| Ylide Preceding <b>Endo-TS1 (PCM - CHCl<sub>3</sub>)</b> .....             | 23 |
| Ylide Preceding <b>Endo-TS1 (PCM - CCl<sub>4</sub>)</b> .....              | 23 |
| Ylide Preceding <b>Endo-TS1 (PCM - dichloroethane)</b> .....               | 24 |
| Ylide Preceding <b>Endo-TS1 (PCM - chlorobenzene)</b> .....                | 25 |
| Ylide Preceding <b>Exo-TS1 (gas phase)</b> .....                           | 26 |
| Ylide Preceding <b>Exo-TS1 (PCM - CH<sub>2</sub>Cl<sub>2</sub>)</b> .....  | 26 |
| Ylide Preceding <b>Exo-TS1 (PCM - CHCl<sub>3</sub>)</b> .....              | 27 |
| Ylide Preceding <b>Exo-TS1 (PCM - CCl<sub>4</sub>)</b> .....               | 28 |
| Ylide Preceding <b>Exo-TS1 (PCM - dichloroethane)</b> .....                | 29 |
| Ylide Preceding <b>Exo-TS1 (PCM - chlorobenzene)</b> .....                 | 29 |
| <b>Transition Structure for Sulfoxide Thermolysis (gas phase)</b> .....    | 30 |
| Optimized Reactant and Transition Structures (B97D/6-31+G(d,p).....        | 31 |
| <b>Endo-TS1 (gas phase)</b> .....                                          | 31 |
| <b>Endo-TS1 (PCM - CH<sub>2</sub>Cl<sub>2</sub>)</b> .....                 | 32 |

|                                                           |    |
|-----------------------------------------------------------|----|
| <b>Exo-TS1 (gas phase)</b> .....                          | 33 |
| <b>Exo-TS1 (PCM - CH<sub>2</sub>Cl<sub>2</sub>)</b> ..... | 33 |

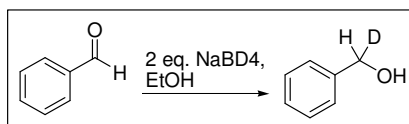

### Synthesis of *d*<sub>1</sub>-Benzyl Alcohol

A 500 mL Erlenmeyer flask with a 2" stir bar was charged with ethanol (200 mL, 3.43 mol) and benzaldehyde (10.9 g, 103.0 mmol). Sodium borodeuteride (2.2 g, 51.5 mmol) was added slowly in approximately 0.25 g portions to maintain the temperature at approximately 10 °C above room temperature. The resulting suspension was stirred for 2.0 hours at ambient temperature. The reaction was worked up by first dissolving the reaction in 1.5 volumes (300 mL) of ice water followed by extraction with 5×50 mL of diethyl ether. The collected organic layers were dried with NaSO<sub>4</sub> and filtered. The diethyl ether was removed using rotary evaporation to provide a clear liquid. The content was purified 1.5" (250 mL) column using 260-400 mesh silica as a stationary phase and 70:30 (hexanes:diethyl ether) mixture as the mobile phase.

<sup>1</sup>H NMR (400MHz, *d*<sub>6</sub>-DMSO): Spectrum 1

NMR 1:  
400 MHz in d<sub>6</sub>-DMSO

```

Sid proton
expt s2pul

SAMPLE 2 2009 temp 30.0
date Mar 2009 30.0
solvent H2O 20
file export/hms~ 20
name l/homes Expt4~ hsc
vname 4-halc-KIE F1d pw90 14.500
ACQUISITION pw90 6.500
sw 7037.3 11
at 7.982 11
mp 11234 in
fb not used ep
bs 32 hs
ss 2
d1 45.000 1b
nt 16 fn
ct 16 65536
TRANSMITTER 16 DISPLAY 403.3
ln H1 SP 3197.6
sfreq 399.754 rft 4048.5
lcf 340.2 rfp 2870.2
lpwr 58 rfp 152.3
pw 14.500 TP -8.6
DECOUPLER C13 WPC PLOT 250
dc C13 WC 250
ddc 16 SC 162
dmm nnc 16
dpr 29 ai cdc ph 2
dnt 29412

```

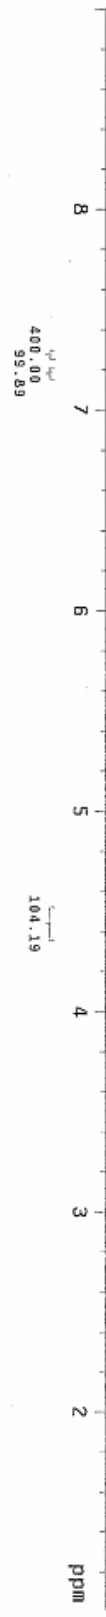

### Procedure for Measuring Intramolecular $^2\text{H}$ KIEs

**Intramolecular Competition Reaction.** To a dried and purged 2-neck 50 mL RBF with a 3/4" stir bar, anhydrous dichloromethane (20.0 mL) and oxalyl chloride (1.2 mL, 1.7 g, 13.5 mmol) were added at ambient temperature. The flask was then placed in dry ice/acetone bath for 15 minutes to allow thermal equilibration to the bath temperature. Dimethyl sulfoxide (DMSO) (1.2 mL, 1.3 g, 16.2 mmol) was added via a 2 mL gastight syringe to the oxalyl chloride solution dropwise over a 2 minute period. After completing the addition and waiting for 10 minutes, *d*<sub>1</sub>-benzyl alcohol (1.2 mL, 1.3 g, 9.0 mmol) was added to the reaction mixture in a dropwise fashion over a 2 minute period. The reaction mixture was stirred at -78 °C for 30 minutes after complete addition of the alcohol. Triethylamine (12.5 mL, 9.1 g, 90.3 mmol) was then added to the reaction mixture dropwise over a 10 minute period. The reaction was stirred for 30 minutes while maintaining a reaction temperature of -78 °C. The reaction was then quenched at -78°C with methanol (1.83 mL, 1.5 g, 45.1 mmol). After completing the dropwise addition of methanol to the reaction mixture and stirring the reaction for an additional 30 minutes at -78 °C, the reaction was allowed to come to room temperature. Once the reaction mixture reached room temperature, water (1.6 mL, 1.6 g, 90.3 mmol) was added to the reaction. The aqueous layer was removed, and the dichloromethane layer was dried using Na<sub>2</sub>SO<sub>4</sub>. Dichloromethane was removed using rotary evaporation at reduced temperature (10 °C) to provide a clear colorless liquid. The benzaldehyde isotopologs were purified using a flash chromatography using a 1.5" diameter column packed to a height of 12" of silica gel. The mobile phase to run the flash chromatography with was a mixture of ethyl ether and hexanes in 30:70 ratio. All fractions containing benzaldehyde were collected to obviate the possibility of spurious fractionation resulting from the separation process. Reactions performed at -63 °C, -47 °C, and -23 °C were equilibrated with slush baths of the following solvents: chloroform, *m*-xylene, and carbon tetrachloride but were otherwise carried out in an identical fashion to the experiments performed at -78 °C.

**NMR Measurement and Calculation.** Approximately 50 mg of sample was dissolved in 0.75 mL of *d*<sub>6</sub>-DMSO and filled to the 5.0 cm mark in a standard 5 mm NMR tube.  $^1\text{H}$  NMR spectra were recorded at 399.754 MHz on a Varian Unity 400 MHz NMR using a sweep width of 6419 Hz. A calibrated 90° pulse width and an acquisition time of 8.00 s were used to collect a total of 74442 points. A delay of 50.0 s (approximately 10 times the duration of the  $T_1$  value for the longest relaxing peak) was used to ensure quantitative relative  $^1\text{H}$  measurement. The *ortho*-aromatic and aldehydic peaks were integrated separately using an integration cut that achieved slightly greater (0.05 ppm) than full width integration. The *ortho*-aromatic peaks were assigned an integration of 200. A total of 8 integrated spectra are used to estimate the integrations of the benzyl peak on the reactant and the aldehydic peak on the product. The error associated with the KIE is reported as the standard deviation computed from the average integrations from five or six experiments. The relative integration of the aldehydic peak was corrected for contamination resulting from benzaldehyde produced from the oxidation of benzyl alcohol, which resulted from protium contamination of the deuteride source, NaBD<sub>4</sub>.











## Derivation of Equations

**Eq. 1** is obvious by inspection under the assumption of facile inversion:

$$KIE_{\text{Intra}} = \frac{[4]}{[5]} = \frac{k_2 + k_4}{k_1 + k_3}$$

**Eq. 2**, which is an expression of the observed intramolecular KIE under the assumption of forbidden inversion of the ylide, is somewhat non-intuitive. We consider the four rate constants that describe the intramolecular KIE derived from the oxidation of (*S*)-*d*<sub>1</sub>-benzyl alcohol (Scheme 3). An equivalent situation is operative for the oxidation of (*R*)-*d*<sub>1</sub>-benzyl alcohol. We start from the definition of the observed KIE:

$$KIE_{\text{Intra}} = \frac{[4]}{[5]} = \frac{[4]_{\text{R}} + [4]_{\text{S}}}{[5]_{\text{R}} + [5]_{\text{S}}}, \text{ where } [4]_{\text{R}} \text{ is } d\text{-benzaldehyde derived from the ylide with an } R\text{-configuration (2)}$$

about the sulfur atom; all other symbols are analogous. We assume that the amount of **2** and **3** formed is equivalent and independent of the label at the benzylic position, i.e.  $[4]_{\text{R}} + [5]_{\text{R}} = [4]_{\text{S}} + [5]_{\text{S}}$ .

Consider the ratios of rates for formation of **4** and **5** from **2** and **3**.

$$\frac{[4]_{\text{R}}}{[5]_{\text{R}}} = \frac{k_4}{k_1} \quad \text{and} \quad \frac{[4]_{\text{S}}}{[5]_{\text{S}}} = \frac{k_2}{k_3}$$

Addition of 1 to each side of each equation yields:

$$\frac{[4]_{\text{R}} + [5]_{\text{R}}}{[5]_{\text{R}}} = \frac{k_1 + k_4}{k_1} \quad \text{and} \quad \frac{[4]_{\text{S}} + [5]_{\text{S}}}{[5]_{\text{S}}} = \frac{k_3 + k_2}{k_3}$$

By our assumption of the equal formation of **2** and **3**:

$$\frac{k_3 + k_2}{k_3} = \frac{[4]_{\text{R}} + [5]_{\text{R}}}{[5]_{\text{S}}}$$

Inversion yields:

$$\frac{[5]_{\text{R}}}{[4]_{\text{R}} + [5]_{\text{R}}} = \frac{k_1}{k_1 + k_4} \quad \text{and} \quad \frac{[5]_{\text{S}}}{[4]_{\text{R}} + [5]_{\text{R}}} = \frac{k_3}{k_2 + k_3}$$

By similar manipulations:

$$\frac{[4]_{\text{R}}}{[4]_{\text{R}} + [5]_{\text{R}}} = \frac{k_4}{k_1 + k_4} \quad \text{and} \quad \frac{[4]_{\text{S}}}{[4]_{\text{S}} + [5]_{\text{S}}} = \frac{k_2}{k_2 + k_3} = \frac{[4]_{\text{S}}}{[4]_{\text{R}} + [5]_{\text{R}}}$$

Collecting over a common denominator:

$$\frac{[5]_{\text{R}} + [5]_{\text{S}}}{[4]_{\text{R}} + [5]_{\text{R}}} = \frac{k_1}{k_1 + k_4} + \frac{k_3}{k_3 + k_2} \quad \text{and} \quad \frac{[4]_{\text{R}} + [4]_{\text{S}}}{[4]_{\text{R}} + [5]_{\text{R}}} = \frac{k_4}{k_1 + k_4} + \frac{k_2}{k_3 + k_2}$$

Taking the ratio to yield the observed intramolecular KIE:

$$\text{KIE}_{\text{Intra}} = \frac{[4]_{\text{R}} + [4]_{\text{S}}}{[5]_{\text{R}} + [5]_{\text{S}}} = \frac{\frac{k_4}{k_1+k_4} + \frac{k_2}{k_3+k_2}}{\frac{k_1}{k_1+k_4} + \frac{k_3}{k_3+k_2}} = \frac{k_1k_2 + 2k_2k_4 + k_3k_4}{k_1k_2 + 2k_1k_3 + k_3k_4}$$

**Eq. 3** is the expression of the intramolecular KIE under the assumption of facile inversion as a function of the primary and secondary KIEs as computed from the *exo*-TS1 and *endo*-TS1 transition structures. This expression is arrived at by manipulating **Eq. 1**:

$$\text{KIE}_{\text{Intra}} = \frac{[4]}{[5]} = \frac{k_2 + k_4}{k_1 + k_3} = \frac{\frac{k_2}{k_{\text{exo}}^{\text{H,H}}} + \frac{k_4}{k_{\text{endo}}^{\text{H,H}}}}{\frac{k_1}{k_{\text{exo}}^{\text{H,H}}} + \frac{k_3}{k_{\text{endo}}^{\text{H,H}}}} = \frac{\frac{1}{2^\circ - \text{KIE}_{\text{exo}}} + \frac{1}{2^\circ - \text{KIE}_{\text{endo}}}}{\frac{1}{1^\circ - \text{KIE}_{\text{exo}}} + \frac{1}{1^\circ - \text{KIE}_{\text{endo}}}} \left( \frac{k_{\text{endo}}^{\text{H,H}}}{k_{\text{exo}}^{\text{H,H}}} \right)$$

**Eq. 4** is the expression of the intramolecular KIE under the assumption of forbidden stereoinversion of the ylide as a function of primary and secondary KIEs as computed from the *exo*-TS1 and *endo*-TS1 transition structures. This expression is arrived at by manipulating **Eq. 3**:

$$\text{KIE}_{\text{Intra}} = \frac{[4]}{[5]} = \frac{k_1k_2 + 2k_2k_4 + k_3k_4}{k_1k_2 + 2k_1k_3 + k_3k_4} = \frac{\frac{k_{\text{exo}}^{\text{H,H}}}{k_1} \frac{k_4}{k_{\text{endo}}^{\text{H,H}}} \left( \frac{k_{\text{endo}}^{\text{H,H}}}{k_{\text{exo}}^{\text{H,H}}} \right) + 2 \frac{k_{\text{endo}}^{\text{H,H}}}{k_3} \frac{k_4}{k_{\text{endo}}^{\text{H,H}}} \frac{k_{\text{exo}}^{\text{H,H}}}{k_1} \frac{k_2}{k_{\text{exo}}^{\text{H,H}}} + \frac{k_{\text{endo}}^{\text{H,H}}}{k_3} \frac{k_2}{k_{\text{exo}}^{\text{H,H}}} \left( \frac{k_{\text{exo}}^{\text{H,H}}}{k_{\text{endo}}^{\text{H,H}}} \right)}{\frac{k_{\text{exo}}^{\text{H,H}}}{k_1} \frac{k_4}{k_{\text{endo}}^{\text{H,H}}} \left( \frac{k_{\text{endo}}^{\text{H,H}}}{k_{\text{exo}}^{\text{H,H}}} \right) + 2 + \frac{k_{\text{endo}}^{\text{H,H}}}{k_3} \frac{k_2}{k_{\text{exo}}^{\text{H,H}}} \left( \frac{k_{\text{exo}}^{\text{H,H}}}{k_{\text{endo}}^{\text{H,H}}} \right)}$$

In terms of primary and secondary KIEs as computed from the *exo*-TS1 and *endo*-TS1 transition structures, this expression becomes **Eq. 4**:

$$\text{KIE}_{\text{Intra}} = \frac{[4]}{[5]} = \frac{\frac{1^\circ - \text{KIE}_{\text{exo}}}{2^\circ - \text{KIE}_{\text{endo}}} \left( \frac{k_{\text{endo}}^{\text{H,H}}}{k_{\text{exo}}^{\text{H,H}}} \right) + 2 \frac{1^\circ - \text{KIE}_{\text{endo}}}{2^\circ - \text{KIE}_{\text{endo}}} \frac{1^\circ - \text{KIE}_{\text{exo}}}{2^\circ - \text{KIE}_{\text{exo}}} + \frac{1^\circ - \text{KIE}_{\text{endo}}}{2^\circ - \text{KIE}_{\text{exo}}} \left( \frac{k_{\text{exo}}^{\text{H,H}}}{k_{\text{endo}}^{\text{H,H}}} \right)}{\frac{1^\circ - \text{KIE}_{\text{exo}}}{2^\circ - \text{KIE}_{\text{endo}}} \left( \frac{k_{\text{endo}}^{\text{H,H}}}{k_{\text{exo}}^{\text{H,H}}} \right) + 2 + \frac{1^\circ - \text{KIE}_{\text{endo}}}{2^\circ - \text{KIE}_{\text{exo}}} \left( \frac{k_{\text{exo}}^{\text{H,H}}}{k_{\text{endo}}^{\text{H,H}}} \right)}$$

**Eq. 5** is arrived at by the following set of manipulations:

$$\frac{k_2 + k_4}{k_1 + k_3} = \frac{k_2}{k_1 + k_3} + \frac{k_4}{k_1 + k_3} = \frac{1}{\frac{k_1}{k_2} + \frac{k_3}{k_2}} + \frac{1}{\frac{k_4}{k_1} + \frac{k_3}{k_4}}$$

**Eq. 6** is obtained by dividing the numerator and denominator of **Eq. 2** by  $k_1k_3$ :

$$\text{KIE}_{\text{Intra}} = \frac{k_1k_2 + 2k_2k_4 + k_3k_4}{k_1k_2 + 2k_1k_3 + k_3k_4} = \frac{\frac{k_2}{k_3} + 2 \frac{k_2}{k_3} \frac{k_1}{k_4} + \frac{k_4}{k_1}}{2 + \frac{k_2}{k_3} + \frac{k_4}{k_1}}$$

## Procedure for Computing KIEs

**Calculation of KIEs from individual transition structures.** Computing primary and secondary  $^2\text{H}$  KIEs from *exo*-TS1 and *endo*-TS1 is accomplished using the Bigeleisen equation. Inputs from this equation were frequencies computed from the optimized reactant and transition structures. An example is shown below for the calculation of the primary  $^2\text{H}$  KIE for the *exo*-TS1 structure.

$$\frac{k_{\text{exo}}^{\text{H,H}}}{k_1} = \frac{Q_{\text{exo}}^{\text{H,H}}}{Q_{\text{t},1}} \frac{v_1^{\ddagger, \text{H,H}}}{v_1^{\ddagger}} \prod_i^{3N^{\ddagger}-7} \left( \frac{u_{i,\text{exo}}^{\ddagger, \text{H,H}}}{u_{i,1}^{\ddagger}} \right) \left( \frac{\exp(u_{i,1}^{\ddagger}/2)}{\exp(u_{i,\text{exo}}^{\ddagger}/2)} \right) \left( \frac{1 - \exp(u_{i,1}^{\ddagger})}{1 - \exp(u_{i,\text{exo}}^{\ddagger})} \right) \prod_i^{3N-6} \left( \frac{u_{i,1}}{u_{i,\text{exo}}} \right) \left( \frac{\exp(u_{i,\text{exo}}^{\text{H,H}}/2)}{\exp(u_{i,1}/2)} \right) \left( \frac{1 - \exp(u_{i,\text{exo}}^{\text{H,H}})}{1 - \exp(u_{i,1})} \right)$$

**Computing KIEs using Eq. 5 and Eq. 6.** Eqs. 5 and 6 in the manuscript express the observed intramolecular  $^2\text{H}$  KIE as a function of four rate constant ratios under the assumption of facile and forbidden stereoinversion of the ylide intermediate. Ratios of rate constants involving the same transition structure, i. e.  $k_1/k_2$  and  $k_3/k_4$  are computed using an abbreviated version (Eq. 7) of the Bigeleisen equation, as the reactant structure and associated frequencies are equivalent. Ratios of rates involving different transition structures, i. e.  $k_3/k_2$  and  $k_1/k_4$  were computed using ratios of the electronic, rotational, and vibrational partition functions for the two transition structures (Eq. 8). Electronic energies, vibrational frequencies, and rotational temperatures were used as input into Eq. 8. It should be stated here that the ylide conformations leading to the *exo*-TS1 and *endo*-TS1 structures are slightly different; however, fractionation at the benzylic position is affected only slightly. For all intents and purposes, the reactant conformational equilibrium is likely quite rapid, and the ylide intermediate should probably be viewed as a weighted average between the two reactant conformers. However, since there is no material fractionation at the benzylic center, such considerations are moot. Eqs. 7 and 8 remain a reasonable means of computing rate constant ratios that can be substituted into Eq. 5 and Eq. 6.

## Computed Structures [B3LYP/6-31+G(d,p)]

All quantum mechanical calculations below were performed with Gaussian03.<sup>1</sup> All structures were fully optimized using the B3LYP hybrid functional together with the 6-31+G(d,p) basis set. All reactant structures were found to have all real frequencies, and the transition structures were found to have exactly one imaginary frequency.

Solvent effects in the computed geometries and frequencies were taken into account by means of the IEFPCM solvation model as implemented in Gaussian03. All IEFPCM calculations were carried out at the B3LYP/6-31+G(d,p) level of theory. The solute cavities were generated using the United Atom Topological Model UA0 set of radii.

1. Gaussian 03, Revision C.02, M. J. Frisch, G. W. Trucks, H. B. Schlegel, G. E. Scuseria, M. A. Robb, J. R. Cheeseman, J. A. Montgomery, Jr., T. Vreven, K. N. Kudin, J. C. Burant, J. M. Millam, S. S. Iyengar, J. Tomasi, V. Barone, B. Mennucci, M. Cossi, G. Scalmani, N. Rega, G. A. Petersson, H. Nakatsuji, M. Hada, M. Ehara, K. Toyota, R. Fukuda, J. Hasegawa, M. Ishida, T. Nakajima, Y. Honda, O. Kitao, H. Nakai, M. Klene, X. Li, J. E. Knox, H. P. Hratchian, J. B. Cross, C. Adamo, J. Jaramillo, R. Gomperts, R. E. Stratmann, O. Yazyev, A. J. Austin, R. Cammi, C. Pomelli, J. W. Ochterski, P. Y. Ayala, K. Morokuma, G. A. Voth, P. Salvador, J. J. Dannenberg, V. G. Zakrzewski, S. Dapprich, A. D. Daniels, M. C. Strain, O. Farkas, D. K. Malick, A. D. Rabuck, K. Raghavachari, J. B. Foresman, J. V. Ortiz, Q. Cui, A. G. Baboul, S. Clifford, J. Cioslowski, B. B. Stefanov, G. Liu, A. Liashenko, P. Piskorz, I. Komaromi, R. L. Martin, D. J. Fox, T. Keith, M. A. Al-Laham, C. Y. Peng, A. Nanayakkara, M. Challacombe, P. M. W. Gill, B. Johnson, W. Chen, M. W. Wong, C. Gonzalez, and J. A. Pople, Gaussian, Inc., Wallingford CT, 2004.

**Model Ylide Stereoinversion Transition Structure (gas phase)**

E(RB+HF-LYP) = -592.313317908

Zero-point correction= 0.104950  
 (Hartree/Particle)  
 Thermal correction to Energy= 0.112304  
 Thermal correction to Enthalpy= 0.113248  
 Thermal correction to Gibbs Free Energy= 0.073163  
 Sum of electronic and zero-point Energies= -592.311521  
 Sum of electronic and thermal Energies= -592.304167  
 Sum of electronic and thermal Enthalpies= -592.303223  
 Sum of electronic and thermal Free Energies= -592.343308

|       |   | E (Thermal) |           | CV             | S              |
|-------|---|-------------|-----------|----------------|----------------|
|       |   | KCal/Mol    |           | Cal/Mol-Kelvin | Cal/Mol-Kelvin |
| Total |   | 70.472      |           | 24.013         | 84.366         |
| S     | 0 | 0.397662    | 0.048435  | -0.133404      |                |
| O     | 0 | -1.131600   | -0.395857 | -0.636260      |                |
| C     | 0 | 1.623233    | -1.199294 | 0.197580       |                |
| H     | 0 | 1.797388    | -1.772269 | -0.689139      |                |
| H     | 0 | 2.535074    | -0.731050 | 0.504491       |                |
| H     | 0 | 1.273956    | -1.844602 | 0.976351       |                |
| C     | 0 | -2.068278   | -0.159317 | 0.418057       |                |
| H     | 0 | -2.064607   | 0.880136  | 0.671869       |                |
| H     | 0 | -3.047888   | -0.444226 | 0.095426       |                |
| H     | 0 | -1.793210   | -0.736872 | 1.275768       |                |
| C     | 0 | 0.802082    | 1.769719  | 0.071590       |                |
| H     | 0 | 0.064602    | 2.519648  | -0.124950      |                |
| H     | 0 | 1.782670    | 2.054495  | 0.391357       |                |

**Model Ylide (7; gas phase)**

E(RB+HF-LYP) = -592.431335667

|   |   |           |           |           |  |
|---|---|-----------|-----------|-----------|--|
| S | 0 | -0.597204 | -0.088512 | -0.468432 |  |
| O | 0 | 1.079585  | -0.151634 | -0.716551 |  |
| C | 0 | 1.912850  | -0.087203 | 0.460483  |  |
| H | 0 | 2.946051  | -0.141131 | 0.131435  |  |
| H | 0 | 1.758726  | 0.848101  | 0.995504  |  |
| H | 0 | 1.704978  | -0.926501 | 1.120043  |  |
| C | 0 | -0.802149 | 1.513639  | 0.349255  |  |
| H | 0 | -1.833794 | 1.801773  | 0.184466  |  |
| H | 0 | -0.610081 | 1.431869  | 1.416562  |  |
| H | 0 | -0.137047 | 2.262723  | -0.082282 |  |
| C | 0 | -1.149254 | -1.300860 | 0.499227  |  |
| H | 0 | -0.670944 | -1.539269 | 1.438234  |  |
| H | 0 | -2.007994 | -1.861765 | 0.169579  |  |

**Endo-TS1 (gas phase)**

E(RB+HF-LYP) = -823.533430085

Zero-point correction= 0.184780  
 (Hartree/Particle)  
 Thermal correction to Energy= 0.195834  
 Thermal correction to Enthalpy= 0.196778  
 Thermal correction to Gibbs Free Energy= 0.146752

Sum of electronic and zero-point Energies= -823.348650  
 Sum of electronic and thermal Energies= -823.337597  
 Sum of electronic and thermal Enthalpies= -823.336652  
 Sum of electronic and thermal Free Energies= -823.386678

|       |   | E (Thermal)<br>KCal/Mol | CV<br>Cal/Mol-Kelvin | S<br>Cal/Mol-Kelvin |
|-------|---|-------------------------|----------------------|---------------------|
| Total |   | 122.887                 | 41.598               | 105.289             |
| C     | 0 | -3.190111               | -0.861164            | -0.574049           |
| C     | 0 | -1.950192               | -1.292976            | -0.099070           |
| C     | 0 | -1.033088               | -0.382988            | 0.447513            |
| C     | 0 | -1.386493               | 0.969341             | 0.516635            |
| C     | 0 | -2.626712               | 1.406183             | 0.039238            |
| C     | 0 | -3.532389               | 0.494126             | -0.509127           |
| H     | 0 | -3.889018               | -1.579559            | -0.994263           |
| H     | 0 | -1.691231               | -2.349200            | -0.151046           |
| H     | 0 | -0.683494               | 1.665463             | 0.963084            |
| H     | 0 | -2.889846               | 2.458751             | 0.105607            |
| H     | 0 | -4.497013               | 0.832477             | -0.876799           |
| C     | 0 | 0.311143                | -0.874903            | 0.973251            |
| H     | 0 | 0.816448                | -1.408196            | 0.038347            |
| H     | 0 | 0.174562                | -1.723280            | 1.672521            |
| O     | 0 | 1.165564                | 0.049468             | 1.417558            |
| S     | 0 | 2.862719                | -0.004871            | -0.044253           |
| C     | 0 | 2.287177                | 1.576323             | -0.737567           |
| H     | 0 | 3.000895                | 1.927545             | -1.485960           |
| H     | 0 | 1.294489                | 1.446137             | -1.168780           |
| H     | 0 | 2.227439                | 2.275070             | 0.097262            |
| C     | 0 | 2.235939                | -1.167279            | -1.045529           |
| H     | 0 | 2.687642                | -2.150943            | -0.993151           |
| H     | 0 | 1.629472                | -0.912054            | -1.907016           |

### **Endo-TS1 (PCM – CH<sub>2</sub>Cl<sub>2</sub>)**

E(RB+HF-LYP) = -823.545644624

Zero-point correction= 0.183984  
 (Hartree/Particle)  
 Thermal correction to Energy= 0.195176  
 Thermal correction to Enthalpy= 0.196120  
 Thermal correction to Gibbs Free Energy= 0.145504  
 Sum of electronic and zero-point Energies= -823.362243  
 Sum of electronic and thermal Energies= -823.351051  
 Sum of electronic and thermal Enthalpies= -823.350107  
 Sum of electronic and thermal Free Energies= -823.400723

|       |   | E (Thermal)<br>KCal/Mol | CV<br>Cal/Mol-Kelvin | S<br>Cal/Mol-Kelvin |
|-------|---|-------------------------|----------------------|---------------------|
| Total |   | 122.475                 | 41.795               | 106.530             |
| C     | 0 | -3.190111               | -0.861164            | -0.574049           |
| C     | 0 | -1.950192               | -1.292976            | -0.099070           |
| C     | 0 | -1.033088               | -0.382988            | 0.447513            |
| C     | 0 | -1.386493               | 0.969341             | 0.516635            |
| C     | 0 | -2.626712               | 1.406183             | 0.039238            |
| C     | 0 | -3.532389               | 0.494126             | -0.509127           |

|   |   |           |           |           |
|---|---|-----------|-----------|-----------|
| H | 0 | -3.889018 | -1.579559 | -0.994263 |
| H | 0 | -1.691231 | -2.349200 | -0.151046 |
| H | 0 | -0.683494 | 1.665463  | 0.963084  |
| H | 0 | -2.889846 | 2.458751  | 0.105608  |
| H | 0 | -4.497013 | 0.832477  | -0.876799 |
| C | 0 | 0.311143  | -0.874903 | 0.973251  |
| H | 0 | 0.816448  | -1.408196 | 0.038347  |
| H | 0 | 0.174562  | -1.723280 | 1.672521  |
| O | 0 | 1.165564  | 0.049468  | 1.417558  |
| S | 0 | 2.862719  | -0.004871 | -0.044253 |
| C | 0 | 2.287177  | 1.576323  | -0.737566 |
| H | 0 | 3.000895  | 1.927545  | -1.485959 |
| H | 0 | 1.294489  | 1.446137  | -1.168780 |
| H | 0 | 2.227439  | 2.275070  | 0.097263  |
| C | 0 | 2.235939  | -1.167279 | -1.045529 |
| H | 0 | 2.687642  | -2.150943 | -0.993151 |
| H | 0 | 1.629472  | -0.912053 | -1.907016 |

**Endo-TS1 (PCM – CHCl<sub>3</sub>)**

E(RB+HF-LYP) = -823.543514245

|                                              |             |
|----------------------------------------------|-------------|
| Zero-point correction=                       | 0.184112    |
| (Hartree/Particle)                           |             |
| Thermal correction to Energy=                | 0.195276    |
| Thermal correction to Enthalpy=              | 0.196221    |
| Thermal correction to Gibbs Free Energy=     | 0.145754    |
| Sum of electronic and zero-point Energies=   | -823.359786 |
| Sum of electronic and thermal Energies=      | -823.348622 |
| Sum of electronic and thermal Enthalpies=    | -823.347677 |
| Sum of electronic and thermal Free Energies= | -823.398144 |

|       |   | E (Thermal) | CV             | S              |
|-------|---|-------------|----------------|----------------|
|       |   | KCal/Mol    | Cal/Mol-Kelvin | Cal/Mol-Kelvin |
| Total |   | 122.538     | 41.759         | 106.216        |
| C     | 0 | -3.190111   | -0.861164      | -0.574049      |
| C     | 0 | -1.950192   | -1.292976      | -0.099070      |
| C     | 0 | -1.033088   | -0.382988      | 0.447513       |
| C     | 0 | -1.386493   | 0.969341       | 0.516635       |
| C     | 0 | -2.626712   | 1.406183       | 0.039238       |
| C     | 0 | -3.532389   | 0.494126       | -0.509127      |
| H     | 0 | -3.889018   | -1.579559      | -0.994263      |
| H     | 0 | -1.691231   | -2.349200      | -0.151046      |
| H     | 0 | -0.683494   | 1.665463       | 0.963084       |
| H     | 0 | -2.889846   | 2.458751       | 0.105608       |
| H     | 0 | -4.497013   | 0.832477       | -0.876799      |
| C     | 0 | 0.311143    | -0.874903      | 0.973251       |
| H     | 0 | 0.816448    | -1.408196      | 0.038347       |
| H     | 0 | 0.174562    | -1.723280      | 1.672521       |
| O     | 0 | 1.165564    | 0.049468       | 1.417558       |
| S     | 0 | 2.862719    | -0.004871      | -0.044253      |
| C     | 0 | 2.287177    | 1.576323       | -0.737566      |
| H     | 0 | 3.000895    | 1.927545       | -1.485959      |
| H     | 0 | 1.294489    | 1.446137       | -1.168780      |
| H     | 0 | 2.227439    | 2.275070       | 0.097263       |
| C     | 0 | 2.235939    | -1.167279      | -1.045529      |

|   |   |          |           |           |
|---|---|----------|-----------|-----------|
| H | 0 | 2.687642 | -2.150943 | -0.993151 |
| H | 0 | 1.629472 | -0.912053 | -1.907016 |

**Endo-TS1 (PCM – CCl<sub>4</sub>)**

E(RB+HF-LYP) = -823.539246853

|                                              |             |
|----------------------------------------------|-------------|
| Zero-point correction=                       | 0.184385    |
| (Hartree/Particle)                           |             |
| Thermal correction to Energy=                | 0.195501    |
| Thermal correction to Enthalpy=              | 0.196445    |
| Thermal correction to Gibbs Free Energy=     | 0.146193    |
| Sum of electronic and zero-point Energies=   | -823.354962 |
| Sum of electronic and thermal Energies=      | -823.343846 |
| Sum of electronic and thermal Enthalpies=    | -823.342902 |
| Sum of electronic and thermal Free Energies= | -823.393154 |

|       |   | E (Thermal) | CV             | S              |
|-------|---|-------------|----------------|----------------|
|       |   | KCal/Mol    | Cal/Mol-Kelvin | Cal/Mol-Kelvin |
| Total |   | 122.679     | 41.691         | 105.764        |
| C     | 0 | -3.190111   | -0.861164      | -0.574049      |
| C     | 0 | -1.950192   | -1.292976      | -0.099070      |
| C     | 0 | -1.033088   | -0.382988      | 0.447513       |
| C     | 0 | -1.386493   | 0.969341       | 0.516635       |
| C     | 0 | -2.626712   | 1.406183       | 0.039238       |
| C     | 0 | -3.532389   | 0.494126       | -0.509127      |
| H     | 0 | -3.889018   | -1.579559      | -0.994263      |
| H     | 0 | -1.691231   | -2.349200      | -0.151046      |
| H     | 0 | -0.683494   | 1.665463       | 0.963084       |
| H     | 0 | -2.889846   | 2.458751       | 0.105608       |
| H     | 0 | -4.497013   | 0.832477       | -0.876799      |
| C     | 0 | 0.311143    | -0.874903      | 0.973251       |
| H     | 0 | 0.816448    | -1.408196      | 0.038347       |
| H     | 0 | 0.174562    | -1.723280      | 1.672521       |
| O     | 0 | 1.165564    | 0.049468       | 1.417558       |
| S     | 0 | 2.862719    | -0.004871      | -0.044253      |
| C     | 0 | 2.287177    | 1.576323       | -0.737566      |
| H     | 0 | 3.000895    | 1.927545       | -1.485959      |
| H     | 0 | 1.294489    | 1.446137       | -1.168780      |
| H     | 0 | 2.227439    | 2.275070       | 0.097263       |
| C     | 0 | 2.235939    | -1.167279      | -1.045529      |
| H     | 0 | 2.687642    | -2.150943      | -0.993151      |
| H     | 0 | 1.629472    | -0.912053      | -1.907016      |

**Endo-TS1 (PCM – dichloroethane)**

E(RB+HF-LYP) = -823.545644624

|                                              |             |
|----------------------------------------------|-------------|
| Zero-point correction=                       | 0.183984    |
| (Hartree/Particle)                           |             |
| Thermal correction to Energy=                | 0.195176    |
| Thermal correction to Enthalpy=              | 0.196120    |
| Thermal correction to Gibbs Free Energy=     | 0.145504    |
| Sum of electronic and zero-point Energies=   | -823.362243 |
| Sum of electronic and thermal Energies=      | -823.351051 |
| Sum of electronic and thermal Enthalpies=    | -823.350107 |
| Sum of electronic and thermal Free Energies= | -823.400723 |

|       |   | E (Thermal) |           | CV             |  | S              |
|-------|---|-------------|-----------|----------------|--|----------------|
|       |   | KCal/Mol    |           | Cal/Mol-Kelvin |  | Cal/Mol-Kelvin |
| Total |   | 122.475     |           | 41.795         |  | 106.530        |
| C     | 0 | -3.190111   | -0.861164 | -0.574049      |  |                |
| C     | 0 | -1.950192   | -1.292976 | -0.099070      |  |                |
| C     | 0 | -1.033088   | -0.382988 | 0.447513       |  |                |
| C     | 0 | -1.386493   | 0.969341  | 0.516635       |  |                |
| C     | 0 | -2.626712   | 1.406183  | 0.039238       |  |                |
| C     | 0 | -3.532389   | 0.494126  | -0.509127      |  |                |
| H     | 0 | -3.889018   | -1.579559 | -0.994263      |  |                |
| H     | 0 | -1.691231   | -2.349200 | -0.151046      |  |                |
| H     | 0 | -0.683494   | 1.665463  | 0.963084       |  |                |
| H     | 0 | -2.889846   | 2.458751  | 0.105608       |  |                |
| H     | 0 | -4.497013   | 0.832477  | -0.876799      |  |                |
| C     | 0 | 0.311143    | -0.874903 | 0.973251       |  |                |
| H     | 0 | 0.816448    | -1.408196 | 0.038347       |  |                |
| H     | 0 | 0.174562    | -1.723280 | 1.672521       |  |                |
| O     | 0 | 1.165564    | 0.049468  | 1.417558       |  |                |
| S     | 0 | 2.862719    | -0.004871 | -0.044253      |  |                |
| C     | 0 | 2.287177    | 1.576323  | -0.737566      |  |                |
| H     | 0 | 3.000895    | 1.927545  | -1.485959      |  |                |
| H     | 0 | 1.294489    | 1.446137  | -1.168780      |  |                |
| H     | 0 | 2.227439    | 2.275070  | 0.097263       |  |                |
| C     | 0 | 2.235939    | -1.167279 | -1.045529      |  |                |
| H     | 0 | 2.687642    | -2.150943 | -0.993151      |  |                |
| H     | 0 | 1.629472    | -0.912053 | -1.907016      |  |                |

### ***Endo-TS1 (PCM – chlorobenzene)***

E(RB+HF-LYP) = -823.544083559

|                                              |             |
|----------------------------------------------|-------------|
| Zero-point correction=                       | 0.184090    |
| (Hartree/Particle)                           |             |
| Thermal correction to Energy=                | 0.195257    |
| Thermal correction to Enthalpy=              | 0.196201    |
| Thermal correction to Gibbs Free Energy=     | 0.145752    |
| Sum of electronic and zero-point Energies=   | -823.360352 |
| Sum of electronic and thermal Energies=      | -823.349185 |
| Sum of electronic and thermal Enthalpies=    | -823.348241 |
| Sum of electronic and thermal Free Energies= | -823.398690 |

|       |   | E (Thermal) |           | CV             |  | S              |
|-------|---|-------------|-----------|----------------|--|----------------|
|       |   | KCal/Mol    |           | Cal/Mol-Kelvin |  | Cal/Mol-Kelvin |
| Total |   | 122.526     |           | 41.769         |  | 106.180        |
| C     | 0 | -3.190111   | -0.861164 | -0.574049      |  |                |
| C     | 0 | -1.950192   | -1.292976 | -0.099070      |  |                |
| C     | 0 | -1.033088   | -0.382988 | 0.447513       |  |                |
| C     | 0 | -1.386493   | 0.969341  | 0.516635       |  |                |
| C     | 0 | -2.626712   | 1.406183  | 0.039238       |  |                |
| C     | 0 | -3.532389   | 0.494126  | -0.509127      |  |                |
| H     | 0 | -3.889018   | -1.579559 | -0.994263      |  |                |
| H     | 0 | -1.691231   | -2.349200 | -0.151046      |  |                |
| H     | 0 | -0.683494   | 1.665463  | 0.963084       |  |                |
| H     | 0 | -2.889846   | 2.458751  | 0.105608       |  |                |



|   |   |           |           |           |
|---|---|-----------|-----------|-----------|
| H | 0 | -4.497013 | 0.832477  | -0.876799 |
| C | 0 | 0.311143  | -0.874903 | 0.973251  |
| H | 0 | 0.816448  | -1.408196 | 0.038347  |
| H | 0 | 0.174562  | -1.723280 | 1.672521  |
| O | 0 | 1.165564  | 0.049468  | 1.417558  |
| S | 0 | 2.862719  | -0.004871 | -0.044253 |
| C | 0 | 2.287177  | 1.576323  | -0.737566 |
| H | 0 | 3.000895  | 1.927545  | -1.485959 |
| H | 0 | 1.294489  | 1.446137  | -1.168780 |
| H | 0 | 2.227439  | 2.275070  | 0.097263  |
| C | 0 | 2.235939  | -1.167279 | -1.045529 |
| H | 0 | 2.687642  | -2.150943 | -0.993151 |
| H | 0 | 1.629472  | -0.912053 | -1.907016 |

**Exo-TS1 (gas phase)**

E(RB+HF-LYP) = -823.534276318

|                                              |             |
|----------------------------------------------|-------------|
| Zero-point correction=                       | 0.184766    |
| (Hartree/Particle)                           |             |
| Thermal correction to Energy=                | 0.195862    |
| Thermal correction to Enthalpy=              | 0.196807    |
| Thermal correction to Gibbs Free Energy=     | 0.146464    |
| Sum of electronic and zero-point Energies=   | -823.349511 |
| Sum of electronic and thermal Energies=      | -823.338414 |
| Sum of electronic and thermal Enthalpies=    | -823.337470 |
| Sum of electronic and thermal Free Energies= | -823.387812 |

|       |   | E (Thermal) | CV             | S              |
|-------|---|-------------|----------------|----------------|
|       |   | KCal/Mol    | Cal/Mol-Kelvin | Cal/Mol-Kelvin |
| Total |   | 122.906     | 41.597         | 105.954        |
| C     | 0 | 2.845770    | -1.377503      | 0.254014       |
| C     | 0 | 1.534998    | -1.075635      | -0.127906      |
| C     | 0 | 1.159226    | 0.246776       | -0.390073      |
| C     | 0 | 2.119657    | 1.261339       | -0.269483      |
| C     | 0 | 3.429982    | 0.962564       | 0.109589       |
| C     | 0 | 3.797366    | -0.360957      | 0.375792       |
| H     | 0 | 3.126352    | -2.409161      | 0.449909       |
| H     | 0 | 0.791198    | -1.857342      | -0.245216      |
| H     | 0 | 1.840376    | 2.292705       | -0.478511      |
| H     | 0 | 4.164247    | 1.759262       | 0.194934       |
| H     | 0 | 4.816618    | -0.596543      | 0.668958       |
| C     | 0 | -0.270529   | 0.589061       | -0.780347      |
| H     | 0 | -0.296918   | 1.403088       | -1.530417      |
| H     | 0 | -0.724685   | 1.135573       | 0.172426       |
| O     | 0 | -1.079103   | -0.434326      | -1.073552      |
| S     | 0 | -2.551834   | -0.495160      | 0.593261       |
| C     | 0 | -3.819973   | -0.038567      | -0.626974      |
| H     | 0 | -4.806179   | -0.061090      | -0.158549      |
| H     | 0 | -3.595103   | 0.950537       | -1.026929      |
| H     | 0 | -3.752951   | -0.771868      | -1.430869      |
| C     | 0 | -2.118814   | 0.930048       | 1.317989       |
| H     | 0 | -1.585444   | 0.857369       | 2.258373       |
| H     | 0 | -2.581437   | 1.871890       | 1.046533       |

**Exo-TS1 (PCM – CH<sub>2</sub>Cl<sub>2</sub>)**

E(RB+HF-LYP) = -823.546858207

Zero-point correction= 0.183972  
 (Hartree/Particle)  
 Thermal correction to Energy= 0.195165  
 Thermal correction to Enthalpy= 0.196109  
 Thermal correction to Gibbs Free Energy= 0.145461  
 Sum of electronic and zero-point Energies= -823.362887  
 Sum of electronic and thermal Energies= -823.351693  
 Sum of electronic and thermal Enthalpies= -823.350749  
 Sum of electronic and thermal Free Energies= -823.401398

|       |   | E (Thermal)<br>KCal/Mol |           | CV<br>Cal/Mol-Kelvin | S<br>Cal/Mol-Kelvin |
|-------|---|-------------------------|-----------|----------------------|---------------------|
| Total |   | 122.468                 |           | 41.761               | 106.599             |
| C     | 0 | 2.838748                | -1.410177 | 0.034141             |                     |
| C     | 0 | 1.526105                | -1.022098 | -0.257467            |                     |
| C     | 0 | 1.176893                | 0.333948  | -0.304644            |                     |
| C     | 0 | 2.169097                | 1.295762  | -0.059474            |                     |
| C     | 0 | 3.481829                | 0.912119  | 0.231058             |                     |
| C     | 0 | 3.821728                | -0.445285 | 0.280758             |                     |
| H     | 0 | 3.095388                | -2.468243 | 0.064042             |                     |
| H     | 0 | 0.762743                | -1.768183 | -0.464641            |                     |
| H     | 0 | 1.912716                | 2.354956  | -0.101557            |                     |
| H     | 0 | 4.240462                | 1.671800  | 0.413816             |                     |
| H     | 0 | 4.843765                | -0.746676 | 0.503706             |                     |
| C     | 0 | -0.254467               | 0.771905  | -0.586800            |                     |
| H     | 0 | -0.266808               | 1.769201  | -1.069886            |                     |
| H     | 0 | -0.706799               | 1.012762  | 0.470332             |                     |
| O     | 0 | -1.057882               | -0.124933 | -1.185815            |                     |
| S     | 0 | -2.599878               | -0.638728 | 0.403154             |                     |
| C     | 0 | -3.856980               | 0.215094  | -0.596311            |                     |
| H     | 0 | -4.834908               | 0.087510  | -0.127076            |                     |
| H     | 0 | -3.596178               | 1.270698  | -0.682369            |                     |
| H     | 0 | -3.840867               | -0.249190 | -1.582924            |                     |
| C     | 0 | -2.138543               | 0.468461  | 1.535350             |                     |
| H     | 0 | -1.574529               | 0.098037  | 2.385320             |                     |
| H     | 0 | -2.560340               | 1.468078  | 1.567617             |                     |

**Exo-TS1 (PCM – CHCl<sub>3</sub>)**

E(RB+HF-LYP) = -823.544513714

Zero-point correction= 0.184070  
 (Hartree/Particle)  
 Thermal correction to Energy= 0.195267  
 Thermal correction to Enthalpy= 0.196211  
 Thermal correction to Gibbs Free Energy= 0.145495  
 Sum of electronic and zero-point Energies= -823.360444  
 Sum of electronic and thermal Energies= -823.349247  
 Sum of electronic and thermal Enthalpies= -823.348303  
 Sum of electronic and thermal Free Energies= -823.399019

|  |  | E (Thermal)<br>KCal/Mol |  | CV<br>Cal/Mol-Kelvin | S<br>Cal/Mol-Kelvin |
|--|--|-------------------------|--|----------------------|---------------------|
|--|--|-------------------------|--|----------------------|---------------------|

|       |   |           |           |           |  |         |
|-------|---|-----------|-----------|-----------|--|---------|
| Total |   | 122.532   |           | 41.743    |  | 106.741 |
| C     | 0 | 2.833921  | -1.409712 | 0.059633  |  |         |
| C     | 0 | 1.522513  | -1.028033 | -0.244528 |  |         |
| C     | 0 | 1.173030  | 0.326539  | -0.316814 |  |         |
| C     | 0 | 2.163452  | 1.293142  | -0.085137 |  |         |
| C     | 0 | 3.474986  | 0.915793  | 0.217273  |  |         |
| C     | 0 | 3.815132  | -0.440121 | 0.293118  |  |         |
| H     | 0 | 3.091210  | -2.466486 | 0.108932  |  |         |
| H     | 0 | 0.760180  | -1.776766 | -0.443733 |  |         |
| H     | 0 | 1.906724  | 2.350886  | -0.147559 |  |         |
| H     | 0 | 4.232361  | 1.678749  | 0.388903  |  |         |
| H     | 0 | 4.836041  | -0.736693 | 0.525570  |  |         |
| C     | 0 | -0.257307 | 0.757534  | -0.611709 |  |         |
| H     | 0 | -0.270930 | 1.738955  | -1.125953 |  |         |
| H     | 0 | -0.709680 | 1.033436  | 0.440294  |  |         |
| O     | 0 | -1.063221 | -0.155961 | -1.176905 |  |         |
| S     | 0 | -2.587878 | -0.625466 | 0.427569  |  |         |
| C     | 0 | -3.851851 | 0.180305  | -0.602256 |  |         |
| H     | 0 | -4.829648 | 0.061406  | -0.130574 |  |         |
| H     | 0 | -3.600040 | 1.234143  | -0.726990 |  |         |
| H     | 0 | -3.828938 | -0.318269 | -1.571822 |  |         |
| C     | 0 | -2.131040 | 0.527882  | 1.517074  |  |         |
| H     | 0 | -1.570818 | 0.191902  | 2.383313  |  |         |
| H     | 0 | -2.561669 | 1.523901  | 1.513831  |  |         |

**Exo-TS1 (PCM – CCl<sub>4</sub>)**

E(RB+HF-LYP) = -823.540034523

|                                              |             |
|----------------------------------------------|-------------|
| Zero-point correction=                       | 0.184291    |
| (Hartree/Particle)                           |             |
| Thermal correction to Energy=                | 0.195444    |
| Thermal correction to Enthalpy=              | 0.196388    |
| Thermal correction to Gibbs Free Energy=     | 0.145852    |
| Sum of electronic and zero-point Energies=   | -823.355744 |
| Sum of electronic and thermal Energies=      | -823.344591 |
| Sum of electronic and thermal Enthalpies=    | -823.343647 |
| Sum of electronic and thermal Free Energies= | -823.394183 |

|       |   | E (Thermal) | CV             | S              |
|-------|---|-------------|----------------|----------------|
|       |   | KCal/Mol    | Cal/Mol-Kelvin | Cal/Mol-Kelvin |
| Total |   | 122.643     | 41.690         | 106.362        |
| C     | 0 | 2.843138    | -1.389266      | 0.200109       |
| C     | 0 | 1.533081    | -1.063714      | -0.166927      |
| C     | 0 | 1.163859    | 0.270450       | -0.376427      |
| C     | 0 | 2.131727    | 1.273541       | -0.217808      |
| C     | 0 | 3.441383    | 0.951841       | 0.147154       |
| C     | 0 | 3.801785    | -0.383873      | 0.360167       |
| H     | 0 | 3.117232    | -2.430701      | 0.354968       |
| H     | 0 | 0.785480    | -1.838548      | -0.310602      |
| H     | 0 | 1.858641    | 2.314985       | -0.385512      |
| H     | 0 | 4.181273    | 1.740977       | 0.262288       |
| H     | 0 | 4.821087    | -0.637375      | 0.641826       |
| C     | 0 | -0.265686   | 0.639823       | -0.746558      |
| H     | 0 | -0.285181   | 1.508600       | -1.433660      |

|   |   |           |           |           |
|---|---|-----------|-----------|-----------|
| H | 0 | -0.718953 | 1.113001  | 0.240556  |
| O | 0 | -1.072463 | -0.360255 | -1.123209 |
| S | 0 | -2.564226 | -0.538641 | 0.551147  |
| C | 0 | -3.837868 | 0.033776  | -0.614124 |
| H | 0 | -4.815259 | 0.006149  | -0.127852 |
| H | 0 | -3.591869 | 1.041395  | -0.950772 |
| H | 0 | -3.809259 | -0.647881 | -1.464669 |
| C | 0 | -2.113369 | 0.815078  | 1.387324  |
| H | 0 | -1.558293 | 0.661581  | 2.306149  |
| H | 0 | -2.565878 | 1.782197  | 1.197137  |

**Exo-TS1 (PCM – dichloroethane)**

E(RB+HF-LYP) = -823.547193202

|                                              |             |
|----------------------------------------------|-------------|
| Zero-point correction=                       | 0.183942    |
| (Hartree/Particle)                           |             |
| Thermal correction to Energy=                | 0.195143    |
| Thermal correction to Enthalpy=              | 0.196087    |
| Thermal correction to Gibbs Free Energy=     | 0.145401    |
| Sum of electronic and zero-point Energies=   | -823.363252 |
| Sum of electronic and thermal Energies=      | -823.352050 |
| Sum of electronic and thermal Enthalpies=    | -823.351106 |
| Sum of electronic and thermal Free Energies= | -823.401792 |

|       |   | E (Thermal) |           | CV             | S              |
|-------|---|-------------|-----------|----------------|----------------|
|       |   | KCal/Mol    |           | Cal/Mol-Kelvin | Cal/Mol-Kelvin |
| Total |   | 122.454     |           | 41.768         | 106.679        |
| C     | 0 | 2.841358    | -1.409304 | 0.036705       |                |
| C     | 0 | 1.528250    | -1.023313 | -0.255863      |                |
| C     | 0 | 1.177377    | 0.332227  | -0.305821      |                |
| C     | 0 | 2.168347    | 1.295688  | -0.061797      |                |
| C     | 0 | 3.481427    | 0.914160  | 0.230107       |                |
| C     | 0 | 3.823090    | -0.442773 | 0.282067       |                |
| H     | 0 | 3.099260    | -2.467084 | 0.068596       |                |
| H     | 0 | 0.765960    | -1.770856 | -0.461501      |                |
| H     | 0 | 1.910645    | 2.354570  | -0.105508      |                |
| H     | 0 | 4.238987    | 1.675164  | 0.412274       |                |
| H     | 0 | 4.845466    | -0.742539 | 0.506013       |                |
| C     | 0 | -0.254329   | 0.768472  | -0.589315      |                |
| H     | 0 | -0.266942   | 1.764306  | -1.075584      |                |
| H     | 0 | -0.706375   | 1.012386  | 0.466952       |                |
| O     | 0 | -1.057287   | -0.130860 | -1.185437      |                |
| S     | 0 | -2.601941   | -0.637449 | 0.404785       |                |
| C     | 0 | -3.857756   | 0.215705  | -0.596808      |                |
| H     | 0 | -4.835677   | 0.091191  | -0.126721      |                |
| H     | 0 | -3.595197   | 1.270633  | -0.685976      |                |
| H     | 0 | -3.843095   | -0.251613 | -1.582024      |                |
| C     | 0 | -2.139245   | 0.471684  | 1.534277       |                |
| H     | 0 | -1.575323   | 0.102545  | 2.384939       |                |
| H     | 0 | -2.559477   | 1.472093  | 1.564166       |                |

**Exo-TS1 (PCM – chlorobenzene)**

E(RB+HF-LYP) = -823.545138216

Zero-point correction= 0.184010  
 (Hartree/Particle)  
 Thermal correction to Energy= 0.195233  
 Thermal correction to Enthalpy= 0.196177  
 Thermal correction to Gibbs Free Energy= 0.145281  
 Sum of electronic and zero-point Energies= -823.361128  
 Sum of electronic and thermal Energies= -823.349905  
 Sum of electronic and thermal Enthalpies= -823.348961  
 Sum of electronic and thermal Free Energies= -823.399857

|       |   | E (Thermal)<br>KCal/Mol | CV<br>Cal/Mol-Kelvin | S<br>Cal/Mol-Kelvin |
|-------|---|-------------------------|----------------------|---------------------|
| Total |   | 122.511                 | 41.762               | 107.119             |
| C     | 0 | 2.833775                | -1.409445            | 0.065668            |
| C     | 0 | 1.522980                | -1.029431            | -0.243669           |
| C     | 0 | 1.172972                | 0.324731             | -0.321696           |
| C     | 0 | 2.162289                | 1.292676             | -0.090424           |
| C     | 0 | 3.473103                | 0.917025             | 0.217294            |
| C     | 0 | 3.813799                | -0.438536            | 0.298751            |
| H     | 0 | 3.091385                | -2.466029            | 0.119522            |
| H     | 0 | 0.761595                | -1.779661            | -0.441496           |
| H     | 0 | 1.905120                | 2.350171             | -0.156987           |
| H     | 0 | 4.229595                | 1.681042             | 0.388777            |
| H     | 0 | 4.834244                | -0.733791            | 0.535383            |
| C     | 0 | -0.256882               | 0.754096             | -0.622305           |
| H     | 0 | -0.268935               | 1.730151             | -1.146745           |
| H     | 0 | -0.709140               | 1.041158             | 0.425577            |
| O     | 0 | -1.063081               | -0.164670            | -1.180020           |
| S     | 0 | -2.586257               | -0.622214            | 0.434138            |
| C     | 0 | -3.854041               | 0.173624             | -0.598761           |
| H     | 0 | -4.829810               | 0.059601             | -0.121690           |
| H     | 0 | -3.602560               | 1.226139             | -0.734919           |
| H     | 0 | -3.835612               | -0.334857            | -1.563278           |
| C     | 0 | -2.129172               | 0.540254             | 1.513146            |
| H     | 0 | -1.563869               | 0.212761             | 2.379440            |
| H     | 0 | -2.560181               | 1.536141             | 1.502349            |

### ***Ylide Preceding Endo-TS1 (gas phase)***

E(RB+HF-LYP) = -823.542959896

Zero-point correction= 0.187448  
 (Hartree/Particle)  
 Thermal correction to Energy= 0.199328  
 Thermal correction to Enthalpy= 0.200272  
 Thermal correction to Gibbs Free Energy= 0.146997  
 Sum of electronic and zero-point Energies= -823.355512  
 Sum of electronic and thermal Energies= -823.343632  
 Sum of electronic and thermal Enthalpies= -823.342688  
 Sum of electronic and thermal Free Energies= -823.395963

|       |   | E (Thermal)<br>KCal/Mol | CV<br>Cal/Mol-Kelvin | S<br>Cal/Mol-Kelvin |
|-------|---|-------------------------|----------------------|---------------------|
| Total |   | 125.080                 | 43.587               | 112.128             |
| C     | 0 | -3.039022               | 1.366693             | 0.365922            |

|   |   |           |           |           |
|---|---|-----------|-----------|-----------|
| C | 0 | -1.729393 | 1.161523  | -0.070580 |
| C | 0 | -1.287577 | -0.119251 | -0.432835 |
| C | 0 | -2.184857 | -1.191033 | -0.346999 |
| C | 0 | -3.498316 | -0.990393 | 0.087804  |
| C | 0 | -3.928215 | 0.289492  | 0.446168  |
| H | 0 | -3.368177 | 2.365214  | 0.640041  |
| H | 0 | -1.039169 | 1.999150  | -0.131258 |
| H | 0 | -1.852163 | -2.188585 | -0.623083 |
| H | 0 | -4.183311 | -1.831713 | 0.145937  |
| H | 0 | -4.948744 | 0.448360  | 0.782917  |
| C | 0 | 0.136375  | -0.336737 | -0.887442 |
| H | 0 | 0.441861  | 0.486569  | -1.554061 |
| H | 0 | 0.209467  | -1.276812 | -1.456154 |
| O | 0 | 0.980524  | -0.374961 | 0.258583  |
| S | 0 | 2.780203  | -0.333867 | -0.196603 |
| C | 0 | 3.138115  | -0.248847 | 1.582955  |
| H | 0 | 4.212539  | -0.381939 | 1.710982  |
| H | 0 | 2.815429  | 0.722999  | 1.960227  |
| H | 0 | 2.577906  | -1.042613 | 2.075170  |
| C | 0 | 3.381566  | 1.061319  | -0.804726 |
| H | 0 | 3.492615  | 1.099702  | -1.881611 |
| H | 0 | 3.382239  | 1.984636  | -0.233728 |

### ***Ylide Preceding Endo-TS1 (PCM – CH<sub>2</sub>Cl<sub>2</sub>)***

E(RB+HF-LYP) = -823.551090020

|                                              |             |
|----------------------------------------------|-------------|
| Zero-point correction=                       | 0.186439    |
| (Hartree/Particle)                           |             |
| Thermal correction to Energy=                | 0.198313    |
| Thermal correction to Enthalpy=              | 0.199257    |
| Thermal correction to Gibbs Free Energy=     | 0.146833    |
| Sum of electronic and zero-point Energies=   | -823.364993 |
| Sum of electronic and thermal Energies=      | -823.353119 |
| Sum of electronic and thermal Enthalpies=    | -823.352175 |
| Sum of electronic and thermal Free Energies= | -823.404599 |

|       | E (Thermal) | CV             | S              |           |
|-------|-------------|----------------|----------------|-----------|
|       | KCal/Mol    | Cal/Mol-Kelvin | Cal/Mol-Kelvin |           |
| Total | 124.443     | 43.772         | 110.336        |           |
| C     | 0           | -3.039022      | 1.366693       | 0.365923  |
| C     | 0           | -1.729393      | 1.161523       | -0.070580 |
| C     | 0           | -1.287577      | -0.119251      | -0.432835 |
| C     | 0           | -2.184857      | -1.191033      | -0.346999 |
| C     | 0           | -3.498316      | -0.990393      | 0.087804  |
| C     | 0           | -3.928215      | 0.289492       | 0.446168  |
| H     | 0           | -3.368177      | 2.365214       | 0.640042  |
| H     | 0           | -1.039169      | 1.999150       | -0.131257 |
| H     | 0           | -1.852163      | -2.188585      | -0.623084 |
| H     | 0           | -4.183311      | -1.831713      | 0.145936  |
| H     | 0           | -4.948744      | 0.448360       | 0.782917  |
| C     | 0           | 0.136375       | -0.336737      | -0.887442 |
| H     | 0           | 0.441861       | 0.486570       | -1.554061 |
| H     | 0           | 0.209467       | -1.276811      | -1.456154 |
| O     | 0           | 0.980524       | -0.374961      | 0.258583  |
| S     | 0           | 2.780203       | -0.333867      | -0.196603 |

|   |   |          |           |           |
|---|---|----------|-----------|-----------|
| C | 0 | 3.138115 | -0.248848 | 1.582955  |
| H | 0 | 4.212539 | -0.381940 | 1.710982  |
| H | 0 | 2.815429 | 0.722998  | 1.960227  |
| H | 0 | 2.577906 | -1.042614 | 2.075170  |
| C | 0 | 3.381566 | 1.061319  | -0.804726 |
| H | 0 | 3.492615 | 1.099703  | -1.881611 |
| H | 0 | 3.382239 | 1.984636  | -0.233727 |

**Ylide Preceding Endo-TS1 (PCM – CHCl<sub>3</sub>)**

E(RB+HF-LYP) = -823.549548977

|                                              |             |
|----------------------------------------------|-------------|
| Zero-point correction=                       | 0.186600    |
| (Hartree/Particle)                           |             |
| Thermal correction to Energy=                | 0.198492    |
| Thermal correction to Enthalpy=              | 0.199437    |
| Thermal correction to Gibbs Free Energy=     | 0.146711    |
| Sum of electronic and zero-point Energies=   | -823.363180 |
| Sum of electronic and thermal Energies=      | -823.351287 |
| Sum of electronic and thermal Enthalpies=    | -823.350342 |
| Sum of electronic and thermal Free Energies= | -823.403069 |

|       | E (Thermal) | CV             | S              |
|-------|-------------|----------------|----------------|
|       | KCal/Mol    | Cal/Mol-Kelvin | Cal/Mol-Kelvin |
| Total | 124.556     | 43.751         | 110.971        |

|   |   |           |           |           |
|---|---|-----------|-----------|-----------|
| C | 0 | -3.039022 | 1.366693  | 0.365923  |
| C | 0 | -1.729393 | 1.161523  | -0.070580 |
| C | 0 | -1.287577 | -0.119251 | -0.432835 |
| C | 0 | -2.184857 | -1.191033 | -0.346999 |
| C | 0 | -3.498316 | -0.990393 | 0.087804  |
| C | 0 | -3.928215 | 0.289492  | 0.446168  |
| H | 0 | -3.368177 | 2.365214  | 0.640042  |
| H | 0 | -1.039169 | 1.999150  | -0.131257 |
| H | 0 | -1.852163 | -2.188585 | -0.623084 |
| H | 0 | -4.183311 | -1.831713 | 0.145936  |
| H | 0 | -4.948744 | 0.448360  | 0.782917  |
| C | 0 | 0.136375  | -0.336737 | -0.887442 |
| H | 0 | 0.441861  | 0.486570  | -1.554061 |
| H | 0 | 0.209467  | -1.276811 | -1.456154 |
| O | 0 | 0.980524  | -0.374961 | 0.258583  |
| S | 0 | 2.780203  | -0.333867 | -0.196603 |
| C | 0 | 3.138115  | -0.248848 | 1.582955  |
| H | 0 | 4.212539  | -0.381940 | 1.710982  |
| H | 0 | 2.815429  | 0.722998  | 1.960227  |
| H | 0 | 2.577906  | -1.042614 | 2.075170  |
| C | 0 | 3.381566  | 1.061319  | -0.804726 |
| H | 0 | 3.492615  | 1.099703  | -1.881611 |
| H | 0 | 3.382239  | 1.984636  | -0.233727 |

**Ylide Preceding Endo-TS1 (PCM – CCl<sub>4</sub>)**

E(RB+HF-LYP) = -823.546684090

|                                 |          |
|---------------------------------|----------|
| Zero-point correction=          | 0.186960 |
| (Hartree/Particle)              |          |
| Thermal correction to Energy=   | 0.198852 |
| Thermal correction to Enthalpy= | 0.199796 |

Thermal correction to Gibbs Free Energy= 0.146774  
 Sum of electronic and zero-point Energies= -823.359789  
 Sum of electronic and thermal Energies= -823.347897  
 Sum of electronic and thermal Enthalpies= -823.346953  
 Sum of electronic and thermal Free Energies= -823.399975

|       |   | E (Thermal) |           | CV             |  | S              |
|-------|---|-------------|-----------|----------------|--|----------------|
|       |   | KCal/Mol    |           | Cal/Mol-Kelvin |  | Cal/Mol-Kelvin |
| Total |   | 124.782     |           | 43.682         |  | 111.594        |
| C     | 0 | -3.039022   | 1.366693  | 0.365923       |  |                |
| C     | 0 | -1.729393   | 1.161523  | -0.070580      |  |                |
| C     | 0 | -1.287577   | -0.119251 | -0.432835      |  |                |
| C     | 0 | -2.184857   | -1.191033 | -0.346999      |  |                |
| C     | 0 | -3.498316   | -0.990393 | 0.087804       |  |                |
| C     | 0 | -3.928215   | 0.289492  | 0.446168       |  |                |
| H     | 0 | -3.368177   | 2.365214  | 0.640042       |  |                |
| H     | 0 | -1.039169   | 1.999150  | -0.131257      |  |                |
| H     | 0 | -1.852163   | -2.188585 | -0.623084      |  |                |
| H     | 0 | -4.183311   | -1.831713 | 0.145936       |  |                |
| H     | 0 | -4.948744   | 0.448360  | 0.782917       |  |                |
| C     | 0 | 0.136375    | -0.336737 | -0.887442      |  |                |
| H     | 0 | 0.441861    | 0.486570  | -1.554061      |  |                |
| H     | 0 | 0.209467    | -1.276811 | -1.456154      |  |                |
| O     | 0 | 0.980524    | -0.374961 | 0.258583       |  |                |
| S     | 0 | 2.780203    | -0.333867 | -0.196603      |  |                |
| C     | 0 | 3.138115    | -0.248848 | 1.582955       |  |                |
| H     | 0 | 4.212539    | -0.381940 | 1.710982       |  |                |
| H     | 0 | 2.815429    | 0.722998  | 1.960227       |  |                |
| H     | 0 | 2.577906    | -1.042614 | 2.075170       |  |                |
| C     | 0 | 3.381566    | 1.061319  | -0.804726      |  |                |
| H     | 0 | 3.492615    | 1.099703  | -1.881611      |  |                |
| H     | 0 | 3.382239    | 1.984636  | -0.233727      |  |                |

### ***Ylide Preceding Endo-TS1 (PCM – dichloroethane)***

E(RB+HF-LYP) = -823.551212757

Zero-point correction= 0.186424  
 (Hartree/Particle)  
 Thermal correction to Energy= 0.198294  
 Thermal correction to Enthalpy= 0.199238  
 Thermal correction to Gibbs Free Energy= 0.146839  
 Sum of electronic and zero-point Energies= -823.365177  
 Sum of electronic and thermal Energies= -823.353307  
 Sum of electronic and thermal Enthalpies= -823.352363  
 Sum of electronic and thermal Free Energies= -823.404763

|       |   | E (Thermal) |           | CV             |  | S              |
|-------|---|-------------|-----------|----------------|--|----------------|
|       |   | KCal/Mol    |           | Cal/Mol-Kelvin |  | Cal/Mol-Kelvin |
| Total |   | 124.431     |           | 43.776         |  | 110.284        |
| C     | 0 | -3.039022   | 1.366693  | 0.365923       |  |                |
| C     | 0 | -1.729393   | 1.161523  | -0.070580      |  |                |
| C     | 0 | -1.287577   | -0.119251 | -0.432835      |  |                |
| C     | 0 | -2.184857   | -1.191033 | -0.346999      |  |                |
| C     | 0 | -3.498316   | -0.990393 | 0.087804       |  |                |



|   |   |           |           |           |
|---|---|-----------|-----------|-----------|
| C | 0 | -3.928215 | 0.289492  | 0.446168  |
| H | 0 | -3.368177 | 2.365214  | 0.640042  |
| H | 0 | -1.039169 | 1.999150  | -0.131257 |
| H | 0 | -1.852163 | -2.188585 | -0.623084 |
| H | 0 | -4.183311 | -1.831713 | 0.145936  |
| H | 0 | -4.948744 | 0.448360  | 0.782917  |
| C | 0 | 0.136375  | -0.336737 | -0.887442 |
| H | 0 | 0.441861  | 0.486570  | -1.554061 |
| H | 0 | 0.209467  | -1.276811 | -1.456154 |
| O | 0 | 0.980524  | -0.374961 | 0.258583  |
| S | 0 | 2.780203  | -0.333867 | -0.196603 |
| C | 0 | 3.138115  | -0.248848 | 1.582955  |
| H | 0 | 4.212539  | -0.381940 | 1.710982  |
| H | 0 | 2.815429  | 0.722998  | 1.960227  |
| H | 0 | 2.577906  | -1.042614 | 2.075170  |
| C | 0 | 3.381566  | 1.061319  | -0.804726 |
| H | 0 | 3.492615  | 1.099703  | -1.881611 |
| H | 0 | 3.382239  | 1.984636  | -0.233727 |

### ***Ylide Preceding Endo-TS1 (PCM – chlorobenzene)***

E(RB+HF-LYP) = -823.549808830

|                                              |             |
|----------------------------------------------|-------------|
| Zero-point correction=                       | 0.186525    |
| (Hartree/Particle)                           |             |
| Thermal correction to Energy=                | 0.198433    |
| Thermal correction to Enthalpy=              | 0.199377    |
| Thermal correction to Gibbs Free Energy=     | 0.146535    |
| Sum of electronic and zero-point Energies=   | -823.363597 |
| Sum of electronic and thermal Energies=      | -823.351688 |
| Sum of electronic and thermal Enthalpies=    | -823.350744 |
| Sum of electronic and thermal Free Energies= | -823.403586 |

|       | E (Thermal) | CV             | S              |           |
|-------|-------------|----------------|----------------|-----------|
|       | KCal/Mol    | Cal/Mol-Kelvin | Cal/Mol-Kelvin |           |
| Total | 124.519     | 43.768         | 111.216        |           |
| C     | 0           | -3.039022      | 1.366693       | 0.365923  |
| C     | 0           | -1.729393      | 1.161523       | -0.070580 |
| C     | 0           | -1.287577      | -0.119251      | -0.432835 |
| C     | 0           | -2.184857      | -1.191033      | -0.346999 |
| C     | 0           | -3.498316      | -0.990393      | 0.087804  |
| C     | 0           | -3.928215      | 0.289492       | 0.446168  |
| H     | 0           | -3.368177      | 2.365214       | 0.640042  |
| H     | 0           | -1.039169      | 1.999150       | -0.131257 |
| H     | 0           | -1.852163      | -2.188585      | -0.623084 |
| H     | 0           | -4.183311      | -1.831713      | 0.145936  |
| H     | 0           | -4.948744      | 0.448360       | 0.782917  |
| C     | 0           | 0.136375       | -0.336737      | -0.887442 |
| H     | 0           | 0.441861       | 0.486570       | -1.554061 |
| H     | 0           | 0.209467       | -1.276811      | -1.456154 |
| O     | 0           | 0.980524       | -0.374961      | 0.258583  |
| S     | 0           | 2.780203       | -0.333867      | -0.196603 |
| C     | 0           | 3.138115       | -0.248848      | 1.582955  |
| H     | 0           | 4.212539       | -0.381940      | 1.710982  |
| H     | 0           | 2.815429       | 0.722998       | 1.960227  |
| H     | 0           | 2.577906       | -1.042614      | 2.075170  |

|   |   |          |          |           |
|---|---|----------|----------|-----------|
| C | 0 | 3.381566 | 1.061319 | -0.804726 |
| H | 0 | 3.492615 | 1.099703 | -1.881611 |
| H | 0 | 3.382239 | 1.984636 | -0.233727 |

### ***Ylide Preceding Exo-TS1 (gas phase)***

E(RB+HF-LYP) = -823.543433402

|                                              |             |
|----------------------------------------------|-------------|
| Zero-point correction=                       | 0.187404    |
| (Hartree/Particle)                           |             |
| Thermal correction to Energy=                | 0.199121    |
| Thermal correction to Enthalpy=              | 0.200066    |
| Thermal correction to Gibbs Free Energy=     | 0.147978    |
| Sum of electronic and zero-point Energies=   | -823.356030 |
| Sum of electronic and thermal Energies=      | -823.344312 |
| Sum of electronic and thermal Enthalpies=    | -823.343368 |
| Sum of electronic and thermal Free Energies= | -823.395455 |

|       |   | E (Thermal) | CV             | S              |
|-------|---|-------------|----------------|----------------|
|       |   | KCal/Mol    | Cal/Mol-Kelvin | Cal/Mol-Kelvin |
| Total |   | 124.951     | 43.611         | 109.627        |
| C     | 0 | -2.738067   | -1.356628      | -0.391884      |
| C     | 0 | -1.518085   | -1.130746      | 0.249363       |
| C     | 0 | -1.123376   | 0.169016       | 0.594763       |
| C     | 0 | -1.974575   | 1.236980       | 0.281865       |
| C     | 0 | -3.198927   | 1.014390       | -0.355351      |
| C     | 0 | -3.584159   | -0.284929      | -0.695250      |
| H     | 0 | -3.029891   | -2.369762      | -0.655243      |
| H     | 0 | -0.856221   | -1.959825      | 0.480609       |
| H     | 0 | -1.676406   | 2.252418       | 0.534673       |
| H     | 0 | -3.845420   | 1.854738       | -0.593095      |
| H     | 0 | -4.532285   | -0.460987      | -1.195380      |
| C     | 0 | 0.182588    | 0.413977       | 1.333967       |
| H     | 0 | 0.030214    | 0.278783       | 2.414015       |
| H     | 0 | 0.493064    | 1.464554       | 1.195506       |
| O     | 0 | 1.230010    | -0.468409      | 0.984539       |
| S     | 0 | 2.077040    | 0.029703       | -0.616817      |
| C     | 0 | 3.384178    | -1.154808      | -0.182710      |
| H     | 0 | 4.029015    | -1.270959      | -1.054245      |
| H     | 0 | 3.943159    | -0.767916      | 0.670846       |
| H     | 0 | 2.905733    | -2.096657      | 0.082897       |
| C     | 0 | 2.824684    | 1.483489       | -0.634142      |
| H     | 0 | 2.283707    | 2.289282       | -1.114993      |
| H     | 0 | 3.657055    | 1.713903       | 0.023427       |

### ***Ylide Preceding Exo-TS1 (PCM - CH<sub>2</sub>Cl<sub>2</sub>)***

E(RB+HF-LYP) = -823.551316504

|                                            |             |
|--------------------------------------------|-------------|
| Zero-point correction=                     | 0.186190    |
| (Hartree/Particle)                         |             |
| Thermal correction to Energy=              | 0.198060    |
| Thermal correction to Enthalpy=            | 0.199004    |
| Thermal correction to Gibbs Free Energy=   | 0.145417    |
| Sum of electronic and zero-point Energies= | -823.365388 |
| Sum of electronic and thermal Energies=    | -823.353518 |
| Sum of electronic and thermal Enthalpies=  | -823.352574 |

Sum of electronic and thermal Free Energies= -823.406161

|       |   | E (Thermal) |           | CV             |  | S              |
|-------|---|-------------|-----------|----------------|--|----------------|
|       |   | KCal/Mol    |           | Cal/Mol-Kelvin |  | Cal/Mol-Kelvin |
| Total |   | 124.284     |           | 43.864         |  | 112.784        |
| C     | 0 | -2.738067   | -1.356628 | -0.391884      |  |                |
| C     | 0 | -1.518085   | -1.130746 | 0.249363       |  |                |
| C     | 0 | -1.123376   | 0.169016  | 0.594763       |  |                |
| C     | 0 | -1.974575   | 1.236980  | 0.281865       |  |                |
| C     | 0 | -3.198927   | 1.014390  | -0.355351      |  |                |
| C     | 0 | -3.584159   | -0.284929 | -0.695250      |  |                |
| H     | 0 | -3.029891   | -2.369762 | -0.655243      |  |                |
| H     | 0 | -0.856221   | -1.959825 | 0.480609       |  |                |
| H     | 0 | -1.676406   | 2.252418  | 0.534673       |  |                |
| H     | 0 | -3.845420   | 1.854738  | -0.593095      |  |                |
| H     | 0 | -4.532285   | -0.460987 | -1.195380      |  |                |
| C     | 0 | 0.182588    | 0.413977  | 1.333967       |  |                |
| H     | 0 | 0.030214    | 0.278783  | 2.414015       |  |                |
| H     | 0 | 0.493064    | 1.464554  | 1.195506       |  |                |
| O     | 0 | 1.230010    | -0.468409 | 0.984539       |  |                |
| S     | 0 | 2.077040    | 0.029703  | -0.616817      |  |                |
| C     | 0 | 3.384178    | -1.154808 | -0.182710      |  |                |
| H     | 0 | 4.029015    | -1.270959 | -1.054245      |  |                |
| H     | 0 | 3.943159    | -0.767916 | 0.670846       |  |                |
| H     | 0 | 2.905733    | -2.096657 | 0.082897       |  |                |
| C     | 0 | 2.824684    | 1.483489  | -0.634142      |  |                |
| H     | 0 | 2.283707    | 2.289282  | -1.114993      |  |                |
| H     | 0 | 3.657055    | 1.713903  | 0.023427       |  |                |

### ***Ylide Preceding Exo-TS1 (PCM – CHCl<sub>3</sub>)***

E(RB+HF-LYP) = -823.549932178

Zero-point correction= 0.186437  
 (Hartree/Particle)  
 Thermal correction to Energy= 0.198256  
 Thermal correction to Enthalpy= 0.199200  
 Thermal correction to Gibbs Free Energy= 0.146405  
 Sum of electronic and zero-point Energies= -823.363640  
 Sum of electronic and thermal Energies= -823.351821  
 Sum of electronic and thermal Enthalpies= -823.350877  
 Sum of electronic and thermal Free Energies= -823.403672

|       |   | E (Thermal) |           | CV             |  | S              |
|-------|---|-------------|-----------|----------------|--|----------------|
|       |   | KCal/Mol    |           | Cal/Mol-Kelvin |  | Cal/Mol-Kelvin |
| Total |   | 124.408     |           | 43.808         |  | 111.117        |
| C     | 0 | -2.738067   | -1.356628 | -0.391884      |  |                |
| C     | 0 | -1.518085   | -1.130746 | 0.249363       |  |                |
| C     | 0 | -1.123376   | 0.169016  | 0.594763       |  |                |
| C     | 0 | -1.974575   | 1.236980  | 0.281865       |  |                |
| C     | 0 | -3.198927   | 1.014390  | -0.355351      |  |                |
| C     | 0 | -3.584159   | -0.284929 | -0.695250      |  |                |
| H     | 0 | -3.029891   | -2.369762 | -0.655243      |  |                |
| H     | 0 | -0.856221   | -1.959825 | 0.480609       |  |                |
| H     | 0 | -1.676406   | 2.252418  | 0.534673       |  |                |

|   |   |           |           |           |
|---|---|-----------|-----------|-----------|
| H | 0 | -3.845420 | 1.854738  | -0.593095 |
| H | 0 | -4.532285 | -0.460987 | -1.195380 |
| C | 0 | 0.182588  | 0.413977  | 1.333967  |
| H | 0 | 0.030214  | 0.278783  | 2.414015  |
| H | 0 | 0.493064  | 1.464554  | 1.195506  |
| O | 0 | 1.230010  | -0.468409 | 0.984539  |
| S | 0 | 2.077040  | 0.029703  | -0.616817 |
| C | 0 | 3.384178  | -1.154808 | -0.182710 |
| H | 0 | 4.029015  | -1.270959 | -1.054245 |
| H | 0 | 3.943159  | -0.767916 | 0.670846  |
| H | 0 | 2.905733  | -2.096657 | 0.082897  |
| C | 0 | 2.824684  | 1.483489  | -0.634142 |
| H | 0 | 2.283707  | 2.289282  | -1.114993 |
| H | 0 | 3.657055  | 1.713903  | 0.023427  |

### ***Ylide Preceding Exo-TS1 (PCM – CCl<sub>4</sub>)***

E(RB+HF-LYP) = -823.547134630

|                                              |             |
|----------------------------------------------|-------------|
| Zero-point correction=                       | 0.186863    |
| (Hartree/Particle)                           |             |
| Thermal correction to Energy=                | 0.198635    |
| Thermal correction to Enthalpy=              | 0.199579    |
| Thermal correction to Gibbs Free Energy=     | 0.147161    |
| Sum of electronic and zero-point Energies=   | -823.360325 |
| Sum of electronic and thermal Energies=      | -823.348553 |
| Sum of electronic and thermal Enthalpies=    | -823.347609 |
| Sum of electronic and thermal Free Energies= | -823.400027 |

|       |   | E (Thermal) | CV             | S              |
|-------|---|-------------|----------------|----------------|
|       |   | KCal/Mol    | Cal/Mol-Kelvin | Cal/Mol-Kelvin |
| Total |   | 124.645     | 43.724         | 110.322        |
| C     | 0 | -2.738067   | -1.356628      | -0.391884      |
| C     | 0 | -1.518085   | -1.130746      | 0.249363       |
| C     | 0 | -1.123376   | 0.169016       | 0.594763       |
| C     | 0 | -1.974575   | 1.236980       | 0.281865       |
| C     | 0 | -3.198927   | 1.014390       | -0.355351      |
| C     | 0 | -3.584159   | -0.284929      | -0.695250      |
| H     | 0 | -3.029891   | -2.369762      | -0.655243      |
| H     | 0 | -0.856221   | -1.959825      | 0.480609       |
| H     | 0 | -1.676406   | 2.252418       | 0.534673       |
| H     | 0 | -3.845420   | 1.854738       | -0.593095      |
| H     | 0 | -4.532285   | -0.460987      | -1.195380      |
| C     | 0 | 0.182588    | 0.413977       | 1.333967       |
| H     | 0 | 0.030214    | 0.278783       | 2.414015       |
| H     | 0 | 0.493064    | 1.464554       | 1.195506       |
| O     | 0 | 1.230010    | -0.468409      | 0.984539       |
| S     | 0 | 2.077040    | 0.029703       | -0.616817      |
| C     | 0 | 3.384178    | -1.154808      | -0.182710      |
| H     | 0 | 4.029015    | -1.270959      | -1.054245      |
| H     | 0 | 3.943159    | -0.767916      | 0.670846       |
| H     | 0 | 2.905733    | -2.096657      | 0.082897       |
| C     | 0 | 2.824684    | 1.483489       | -0.634142      |
| H     | 0 | 2.283707    | 2.289282       | -1.114993      |
| H     | 0 | 3.657055    | 1.713903       | 0.023427       |

**Ylide Preceding Exo-TS1 (PCM – dichloroethane)**

E(RB+HF-LYP) = -823.551531763

Zero-point correction= 0.186202  
 (Hartree/Particle)  
 Thermal correction to Energy= 0.198043  
 Thermal correction to Enthalpy= 0.198987  
 Thermal correction to Gibbs Free Energy= 0.145989  
 Sum of electronic and zero-point Energies= -823.365555  
 Sum of electronic and thermal Energies= -823.353714  
 Sum of electronic and thermal Enthalpies= -823.352770  
 Sum of electronic and thermal Free Energies= -823.405768

|       |   | E (Thermal) |           | CV             | S              |
|-------|---|-------------|-----------|----------------|----------------|
|       |   | KCal/Mol    |           | Cal/Mol-Kelvin | Cal/Mol-Kelvin |
| Total |   | 124.274     |           | 43.853         | 111.543        |
| C     | 0 | -2.738067   | -1.356628 | -0.391884      |                |
| C     | 0 | -1.518085   | -1.130746 | 0.249363       |                |
| C     | 0 | -1.123376   | 0.169016  | 0.594763       |                |
| C     | 0 | -1.974575   | 1.236980  | 0.281865       |                |
| C     | 0 | -3.198927   | 1.014390  | -0.355351      |                |
| C     | 0 | -3.584159   | -0.284929 | -0.695250      |                |
| H     | 0 | -3.029891   | -2.369762 | -0.655243      |                |
| H     | 0 | -0.856221   | -1.959825 | 0.480609       |                |
| H     | 0 | -1.676406   | 2.252418  | 0.534673       |                |
| H     | 0 | -3.845420   | 1.854738  | -0.593095      |                |
| H     | 0 | -4.532285   | -0.460987 | -1.195380      |                |
| C     | 0 | 0.182588    | 0.413977  | 1.333967       |                |
| H     | 0 | 0.030214    | 0.278783  | 2.414015       |                |
| H     | 0 | 0.493064    | 1.464554  | 1.195506       |                |
| O     | 0 | 1.230010    | -0.468409 | 0.984539       |                |
| S     | 0 | 2.077040    | 0.029703  | -0.616817      |                |
| C     | 0 | 3.384178    | -1.154808 | -0.182710      |                |
| H     | 0 | 4.029015    | -1.270959 | -1.054245      |                |
| H     | 0 | 3.943159    | -0.767916 | 0.670846       |                |
| H     | 0 | 2.905733    | -2.096657 | 0.082897       |                |
| C     | 0 | 2.824684    | 1.483489  | -0.634142      |                |
| H     | 0 | 2.283707    | 2.289282  | -1.114993      |                |
| H     | 0 | 3.657055    | 1.713903  | 0.023427       |                |

**Ylide Preceding Exo-TS1 (PCM – chlorobenzene)**

E(RB+HF-LYP) = -823.550231557

Zero-point correction= 0.186390  
 (Hartree/Particle)  
 Thermal correction to Energy= 0.198215  
 Thermal correction to Enthalpy= 0.199159  
 Thermal correction to Gibbs Free Energy= 0.146341  
 Sum of electronic and zero-point Energies= -823.363985  
 Sum of electronic and thermal Energies= -823.352160  
 Sum of electronic and thermal Enthalpies= -823.351216  
 Sum of electronic and thermal Free Energies= -823.404034

|  | E (Thermal) |  | CV             | S              |
|--|-------------|--|----------------|----------------|
|  | KCal/Mol    |  | Cal/Mol-Kelvin | Cal/Mol-Kelvin |

| Total |   | 124.382   | 43.820    | 111.166   |
|-------|---|-----------|-----------|-----------|
| C     | 0 | -2.738067 | -1.356628 | -0.391884 |
| C     | 0 | -1.518085 | -1.130746 | 0.249363  |
| C     | 0 | -1.123376 | 0.169016  | 0.594763  |
| C     | 0 | -1.974575 | 1.236980  | 0.281865  |
| C     | 0 | -3.198927 | 1.014390  | -0.355351 |
| C     | 0 | -3.584159 | -0.284929 | -0.695250 |
| H     | 0 | -3.029891 | -2.369762 | -0.655243 |
| H     | 0 | -0.856221 | -1.959825 | 0.480609  |
| H     | 0 | -1.676406 | 2.252418  | 0.534673  |
| H     | 0 | -3.845420 | 1.854738  | -0.593095 |
| H     | 0 | -4.532285 | -0.460987 | -1.195380 |
| C     | 0 | 0.182588  | 0.413977  | 1.333967  |
| H     | 0 | 0.030214  | 0.278783  | 2.414015  |
| H     | 0 | 0.493064  | 1.464554  | 1.195506  |
| O     | 0 | 1.230010  | -0.468409 | 0.984539  |
| S     | 0 | 2.077040  | 0.029703  | -0.616817 |
| C     | 0 | 3.384178  | -1.154808 | -0.182710 |
| H     | 0 | 4.029015  | -1.270959 | -1.054245 |
| H     | 0 | 3.943159  | -0.767916 | 0.670846  |
| H     | 0 | 2.905733  | -2.096657 | 0.082897  |
| C     | 0 | 2.824684  | 1.483489  | -0.634142 |
| H     | 0 | 2.283707  | 2.289282  | -1.114993 |
| H     | 0 | 3.657055  | 1.713903  | 0.023427  |

***Transition Structure for Sulfoxide Thermolysis (gas phase)***

E(RB+HF-LYP) = -823.504734379

|   |   |           |           |           |
|---|---|-----------|-----------|-----------|
| C | 0 | -2.849189 | -1.388131 | -0.175293 |
| C | 0 | -1.538578 | -1.052482 | 0.177902  |
| C | 0 | -1.172178 | 0.286729  | 0.353890  |
| C | 0 | -2.141775 | 1.284069  | 0.176397  |
| C | 0 | -3.451947 | 0.951689  | -0.174154 |
| C | 0 | -3.809976 | -0.388818 | -0.354158 |
| H | 0 | -3.122406 | -2.432253 | -0.304061 |
| H | 0 | -0.787561 | -1.819354 | 0.338981  |
| H | 0 | -1.869773 | 2.328715  | 0.318298  |
| H | 0 | -4.193351 | 1.735607  | -0.304338 |
| H | 0 | -4.829072 | -0.650430 | -0.624942 |
| C | 0 | 0.257126  | 0.664182  | 0.712067  |
| H | 0 | 0.281497  | 1.523943  | 1.409319  |
| H | 0 | 0.700652  | 1.153284  | -0.276251 |
| S | 0 | 2.538612  | -0.486169 | -0.606342 |
| C | 0 | 3.810630  | 0.056266  | 0.574066  |
| H | 0 | 4.793994  | 0.012142  | 0.101223  |
| H | 0 | 3.580073  | 1.066750  | 0.912628  |
| H | 0 | 3.754828  | -0.625546 | 1.422881  |
| O | 0 | 2.126255  | 0.773772  | -1.349308 |
| C | 0 | 1.115607  | -0.380454 | 1.080401  |
| H | 0 | 2.059809  | 0.023101  | 1.381276  |
| H | 0 | 0.685152  | -0.925733 | 1.894206  |

### Computed Structures [B97D/6-31+G(d,p)]

All quantum mechanical calculations below were performed with Gaussian09.<sup>2</sup> All structures were fully optimized using the B97D hybrid functional together with the 6-31+G(d,p) basis set. All transition structures were found to have exactly one imaginary frequency.

Solvent effects in the computed geometries and frequencies were taken into account by means of the IEFPCM solvation model as implemented in Gaussian09. All IEFPCM calculations were carried out at the B97D/6-31+G(d,p) level of theory. The solute cavities were generated using the United Atom Topological Model UA0 set of radii.

2. Gaussian 09, Revision A.02,  
 M. J. Frisch, G. W. Trucks, H. B. Schlegel, G. E. Scuseria,  
 M. A. Robb, J. R. Cheeseman, G. Scalmani, V. Barone, B. Mennucci,  
 G. A. Petersson, H. Nakatsuji, M. Caricato, X. Li, H. P. Hratchian,  
 A. F. Izmaylov, J. Bloino, G. Zheng, J. L. Sonnenberg, M. Hada,  
 M. Ehara, K. Toyota, R. Fukuda, J. Hasegawa, M. Ishida, T. Nakajima,  
 Y. Honda, O. Kitao, H. Nakai, T. Vreven, J. A. Montgomery, Jr.,  
 J. E. Peralta, F. Ogliaro, M. Bearpark, J. J. Heyd, E. Brothers,  
 K. N. Kudin, V. N. Staroverov, R. Kobayashi, J. Normand,  
 K. Raghavachari, A. Rendell, J. C. Burant, S. S. Iyengar, J. Tomasi,  
 M. Cossi, N. Rega, J. M. Millam, M. Klene, J. E. Knox, J. B. Cross,  
 V. Bakken, C. Adamo, J. Jaramillo, R. Gomperts, R. E. Stratmann,  
 O. Yazyev, A. J. Austin, R. Cammi, C. Pomelli, J. W. Ochterski,  
 R. L. Martin, K. Morokuma, V. G. Zakrzewski, G. A. Voth,  
 P. Salvador, J. J. Dannenberg, S. Dapprich, A. D. Daniels,  
 O. Farkas, J. B. Foresman, J. V. Ortiz, J. Cioslowski,  
 and D. J. Fox, Gaussian, Inc., Wallingford CT, 2009.

#### Endo-TS1 (gas phase)

E(B97D) = -823.2331667

|                                              |             |
|----------------------------------------------|-------------|
| Zero-point correction=                       | 0.180116    |
| (Hartree/Particle)                           |             |
| Thermal correction to Energy=                | 0.191446    |
| Thermal correction to Enthalpy=              | 0.192391    |
| Thermal correction to Gibbs Free Energy=     | 0.141821    |
| Sum of electronic and zero-point Energies=   | -823.053051 |
| Sum of electronic and thermal Energies=      | -823.041720 |
| Sum of electronic and thermal Enthalpies=    | -823.040776 |
| Sum of electronic and thermal Free Energies= | -823.091345 |

|       |   | E (Thermal) |           | CV             | S              |
|-------|---|-------------|-----------|----------------|----------------|
|       |   | KCal/Mol    |           | Cal/Mol-Kelvin | Cal/Mol-Kelvin |
| Total |   | 120.134     |           | 42.956         | 106.432        |
| C     | 0 | -3.053333   | -0.887302 | -0.665137      |                |
| C     | 0 | -1.825514   | -1.320362 | -0.139215      |                |
| C     | 0 | -0.962542   | -0.418626 | 0.514913       |                |
| C     | 0 | -1.352414   | 0.927372  | 0.637817       |                |
| C     | 0 | -2.579405   | 1.366646  | 0.110429       |                |
| C     | 0 | -3.433412   | 0.462153  | -0.544385      |                |
| H     | 0 | -3.710899   | -1.597279 | -1.170631      |                |
| H     | 0 | -1.529781   | -2.368782 | -0.237198      |                |
| H     | 0 | -0.682773   | 1.614673  | 1.155590       |                |
| H     | 0 | -2.872994   | 2.412949  | 0.217715       |                |
| H     | 0 | -4.386334   | 0.802421  | -0.953108      |                |

|   |   |          |           |           |
|---|---|----------|-----------|-----------|
| C | 0 | 0.374063 | -0.913085 | 1.081351  |
| H | 0 | 0.865588 | -1.500959 | 0.188570  |
| H | 0 | 0.211312 | -1.720971 | 1.830908  |
| O | 0 | 1.238754 | 0.029149  | 1.507122  |
| S | 0 | 2.791440 | 0.116728  | -0.129954 |
| C | 0 | 1.908576 | 1.565293  | -0.819522 |
| H | 0 | 2.453794 | 1.945367  | -1.694322 |
| H | 0 | 0.887628 | 1.262083  | -1.077082 |
| H | 0 | 1.872295 | 2.314360  | -0.020760 |
| C | 0 | 2.256769 | -1.146124 | -1.069391 |
| H | 0 | 2.805962 | -2.083288 | -1.004976 |
| H | 0 | 1.516411 | -0.997208 | -1.853579 |

**Endo-TS1 (PCM - CH<sub>2</sub>Cl<sub>2</sub>)**

E(RB97D) = -823.241536091

|                                              |             |
|----------------------------------------------|-------------|
| Zero-point correction=                       | 0.180161    |
| (Hartree/Particle)                           |             |
| Thermal correction to Energy=                | 0.191637    |
| Thermal correction to Enthalpy=              | 0.192582    |
| Thermal correction to Gibbs Free Energy=     | 0.141471    |
| Sum of electronic and zero-point Energies=   | -823.062042 |
| Sum of electronic and thermal Energies=      | -823.050566 |
| Sum of electronic and thermal Enthalpies=    | -823.049622 |
| Sum of electronic and thermal Free Energies= | -823.100732 |

|       |   | E (Thermal) |           | CV             | S              |
|-------|---|-------------|-----------|----------------|----------------|
|       |   | KCal/Mol    |           | Cal/Mol-Kelvin | Cal/Mol-Kelvin |
| Total |   | 120.254     |           | 43.187         | 107.571        |
| C     | 0 | -3.163749   | -0.808175 | -0.642089      |                |
| C     | 0 | -1.939065   | -1.311985 | -0.173621      |                |
| C     | 0 | -1.000304   | -0.463800 | 0.449623       |                |
| C     | 0 | -1.312435   | 0.899121  | 0.600870       |                |
| C     | 0 | -2.537155   | 1.409831  | 0.131987       |                |
| C     | 0 | -3.466806   | 0.559096  | -0.492172      |                |
| H     | 0 | -3.879066   | -1.477200 | -1.124395      |                |
| H     | 0 | -1.705057   | -2.373364 | -0.293838      |                |
| H     | 0 | -0.584861   | 1.547974  | 1.088641       |                |
| H     | 0 | -2.766805   | 2.469870  | 0.257667       |                |
| H     | 0 | -4.416839   | 0.953809  | -0.856138      |                |
| C     | 0 | 0.331181    | -1.044970 | 0.944113       |                |
| H     | 0 | 0.808543    | -1.524968 | 0.004206       |                |
| H     | 0 | 0.137381    | -1.927830 | 1.595252       |                |
| O     | 0 | 1.209694    | -0.170230 | 1.502217       |                |
| S     | 0 | 2.818399    | 0.092056  | -0.079545      |                |
| C     | 0 | 2.012254    | 1.642170  | -0.625659      |                |
| H     | 0 | 2.621146    | 2.101113  | -1.415159      |                |
| H     | 0 | 1.003107    | 1.406475  | -0.980039      |                |
| H     | 0 | 1.956474    | 2.292951  | 0.253486       |                |
| C     | 0 | 2.340698    | -1.019042 | -1.207082      |                |
| H     | 0 | 2.845570    | -1.983016 | -1.205452      |                |
| H     | 0 | 1.620747    | -0.770339 | -1.985070      |                |



**Exo-TS1 (gas phase)**

E(RB97D) = -823.232178620

Zero-point correction= 0.179996  
 (Hartree/Particle)  
 Thermal correction to Energy= 0.191449  
 Thermal correction to Enthalpy= 0.192393  
 Thermal correction to Gibbs Free Energy= 0.141254  
 Sum of electronic and zero-point Energies= -823.052182  
 Sum of electronic and thermal Energies= -823.040730  
 Sum of electronic and thermal Enthalpies= -823.039786  
 Sum of electronic and thermal Free Energies= -823.090924

|       |   | E (Thermal) |           | CV             |  | S              |
|-------|---|-------------|-----------|----------------|--|----------------|
|       |   | KCal/Mol    |           | Cal/Mol-Kelvin |  | Cal/Mol-Kelvin |
| Total |   | 120.136     |           | 43.059         |  | 107.630        |
| C     | 0 | 2.799901    | -1.417547 | 0.146243       |  |                |
| C     | 0 | 1.496475    | -1.049048 | -0.229436      |  |                |
| C     | 0 | 1.158354    | 0.306680  | -0.388958      |  |                |
| C     | 0 | 2.144220    | 1.288881  | -0.169523      |  |                |
| C     | 0 | 3.447443    | 0.924616  | 0.204790       |  |                |
| C     | 0 | 3.779117    | -0.433254 | 0.366469       |  |                |
| H     | 0 | 3.053468    | -2.473407 | 0.261087       |  |                |
| H     | 0 | 0.729008    | -1.799507 | -0.421388      |  |                |
| H     | 0 | 1.887728    | 2.344537  | -0.296354      |  |                |
| H     | 0 | 4.203333    | 1.695349  | 0.367946       |  |                |
| H     | 0 | 4.791955    | -0.719570 | 0.655097       |  |                |
| C     | 0 | -0.265812   | 0.725898  | -0.753367      |  |                |
| H     | 0 | -0.257002   | 1.607891  | -1.433003      |  |                |
| H     | 0 | -0.698574   | 1.183131  | 0.236653       |  |                |
| O     | 0 | -1.099107   | -0.253101 | -1.174512      |  |                |
| S     | 0 | -2.508930   | -0.576186 | 0.521032       |  |                |
| C     | 0 | -3.835287   | 0.039028  | -0.577850      |  |                |
| H     | 0 | -4.809632   | -0.086724 | -0.086694      |  |                |
| H     | 0 | -3.636230   | 1.092193  | -0.808654      |  |                |
| H     | 0 | -3.773113   | -0.551990 | -1.498354      |  |                |
| C     | 0 | -2.130302   | 0.731718  | 1.470320       |  |                |
| H     | 0 | -1.521967   | 0.547378  | 2.353179       |  |                |
| H     | 0 | -2.597896   | 1.702684  | 1.317941       |  |                |

**Exo-TS1 (PCM - CH<sub>2</sub>Cl<sub>2</sub>)**

E(RB97D) = -823.241252287

Zero-point correction= 0.180159  
 (Hartree/Particle)  
 Thermal correction to Energy= 0.191683  
 Thermal correction to Enthalpy= 0.192627  
 Thermal correction to Gibbs Free Energy= 0.141125  
 Sum of electronic and zero-point Energies= -823.061488  
 Sum of electronic and thermal Energies= -823.049964  
 Sum of electronic and thermal Enthalpies= -823.049020  
 Sum of electronic and thermal Free Energies= -823.100522

|  |  | E (Thermal) |  | CV             |  | S              |
|--|--|-------------|--|----------------|--|----------------|
|  |  | KCal/Mol    |  | Cal/Mol-Kelvin |  | Cal/Mol-Kelvin |

|       |   |           |           |           |  |         |
|-------|---|-----------|-----------|-----------|--|---------|
| Total |   | 120.283   |           | 43.174    |  | 108.394 |
| C     | 0 | 2.766851  | -1.426758 | -0.221679 |  |         |
| C     | 0 | 1.461269  | -0.932213 | -0.388377 |  |         |
| C     | 0 | 1.181683  | 0.433499  | -0.188081 |  |         |
| C     | 0 | 2.232995  | 1.297005  | 0.179397  |  |         |
| C     | 0 | 3.540468  | 0.807763  | 0.346019  |  |         |
| C     | 0 | 3.811709  | -0.558754 | 0.146791  |  |         |
| H     | 0 | 2.970706  | -2.487269 | -0.382703 |  |         |
| H     | 0 | 0.647610  | -1.594236 | -0.687956 |  |         |
| H     | 0 | 2.024768  | 2.359722  | 0.329505  |  |         |
| H     | 0 | 4.345787  | 1.490498  | 0.623946  |  |         |
| H     | 0 | 4.826190  | -0.941190 | 0.271297  |  |         |
| C     | 0 | -0.243382 | 0.973670  | -0.319106 |  |         |
| H     | 0 | -0.218886 | 2.067888  | -0.521200 |  |         |
| H     | 0 | -0.681178 | 0.918045  | 0.752128  |  |         |
| O     | 0 | -1.065505 | 0.297008  | -1.170462 |  |         |
| S     | 0 | -2.569338 | -0.723665 | 0.151846  |  |         |
| C     | 0 | -3.856124 | 0.403167  | -0.496266 |  |         |
| H     | 0 | -4.830335 | 0.103570  | -0.089298 |  |         |
| H     | 0 | -3.602614 | 1.430117  | -0.209051 |  |         |
| H     | 0 | -3.839882 | 0.303018  | -1.586788 |  |         |
| C     | 0 | -2.196537 | -0.095658 | 1.634428  |  |         |
| H     | 0 | -1.586887 | -0.706399 | 2.297259  |  |         |
| H     | 0 | -2.615428 | 0.848491  | 1.978266  |  |         |
